1 **A novel anti-influenza combined therapy assessed by single cell RNA-sequencing**

2

3 *Chiara Medaglia\**, *Ilya Kolpakov*, *Yong Zhu*, *Samuel Constant*, *Song Huang*, *Arnaud Charles-*  
4 *Antoine Zwygart*, *Valeria Cagno*, *Emmanouil T. Dermitzakis*, *Francesco Stellacci*, *Ioannis*  
5 *Xenarios* and *Caroline Tapparel\**.

6

7 Dr. C. Medaglia, A.C.A. Zwygart, Prof. C. Tapparel  
8 Department of Microbiology and Molecular Medicine  
9 University of Geneva

10 Geneva 1206, Switzerland

11 \*corresponding authors:

12 [caroline.tapparel@unige.ch](mailto:caroline.tapparel@unige.ch)

13 [chiara.medaglia@unige.ch](mailto:chiara.medaglia@unige.ch).

14

15 Dr. I. Kolpakov, Prof. E.T. Dermitzakis, Prof. I. Xenarios

16 Health 2030 Genome Center,

17 Geneva 1202, Switzerland

18

19 Y. Zhu, Prof. F. Stellacci

20 Institute of Materials, Ecole Polytechnique Fédérale de Lausanne,

21 Lausanne 1015, Switzerland

22

23 Dr. S. Constant, Dr. S. Huang

24 Epithelix Sas

25 Geneva, 1228, Switzerland

26

27 Dr. V. Cagno

28 Faculty of Biology and Medicine, Université de Lausanne

29 Lausanne 1011, Switzerland

30

31

32 **Keywords:** scRNA-sequencing, influenza virus, interferon lambda, combined therapy, human

33 airway epithelia.

34

35 Influenza makes millions of people ill every year, placing a large burden on the healthcare

36 system and the economy. To develop a novel treatment against influenza, we combined

37 virucidal sialylated cyclodextrins with interferon lambda and demonstrated, in human airway

38 epithelia, that the two compounds inhibit the replication of a clinical H1N1 strain more

39 efficiently when administered together rather than alone. We investigated the mechanism of

40 action of the combined treatment by single cell RNA sequencing analysis and found that both  
41 the single and combined treatments impair viral replication to different extents across distinct  
42 epithelial cell types. We also showed that each cell type comprises multiple sub-types, whose  
43 proportions are altered by H1N1 infection, and assess the ability of the treatments to restore  
44 them. To the best of our knowledge this is the first study investigating the effectiveness of an  
45 antiviral therapy by transcriptomic studies at the single cell level.

46

## 47 **1. Introduction**

48

49 Influenza is a highly contagious respiratory infection that accounts every year for about ~ 3 to  
50 5 million cases of severe illness and up to 650,000 deaths (1). More than a century after the  
51 “Spanish” pandemic, the health systems are still struggling to cope with seasonal influenza,  
52 something that bodes poorly in the event of a novel pandemic. Influenza is caused, in humans,  
53 by influenza A (IAV) and influenza B (IBV) viruses. Although the latter are almost exclusively  
54 found in the human population, IAVs emerge from a huge zoonotic reservoir (2). In a process  
55 called antigenic drift IAVs rapidly acquire adaptive mutations allowing them not only to evade  
56 the host immune response but also to neutralize annual attempts to generate effective vaccines  
57 (3). As a consequence, seasonal epidemics endanger every year children, elderly people,  
58 pregnant women and people of any age with comorbid illnesses (4). In addition, due to their  
59 ability to cross the species barrier, IAVs pose a high pandemic risk. The arrangement of the  
60 viral genome on multiple RNA segments allows for exchange of genetic material between  
61 different viral strains which co-infect the same host, giving rise to novel gene-reassorted  
62 variants. This process, when accompanied by the expression of new surface glycoproteins, is  
63 named antigenic shift, as it results in the emergence of strains which infect immunologically  
64 naive humans and cause potentially pandemic outbreaks (5). Lastly, when the viral reassortants  
65 possess new virulence factors, they can be associated with increased pathogenicity.

66 Influenza virus (IV) is enveloped, with a negative single strand RNA genome. The viral protein  
67 hemagglutinin (HA) of human IV binds preferentially  $\alpha$ 2,6- linked sialic acid (Sia) moieties  
68 located on the surface of the host cell, thus triggering viral entry through clathrin-mediated  
69 endocytosis (6). Upon entering a new host, IV establishes an infection in the epithelial cells  
70 lining the upper airways (7). When the infection stays restricted to this region of the respiratory  
71 tract it causes a rather mild disease. But if it spreads to the lungs it can determine viral  
72 pneumonia, with progression to acute respiratory distress syndrome (ARDS) and death from  
73 respiratory failure (8). IAV disrupts the functions of the respiratory barrier by inducing  
74 epithelial cell death via intrinsic viral pathogenicity, or through a robust immune response (9).  
75 This alteration leads to exposure of new attachment sites for bacteria (10), thus making the host  
76 more vulnerable to secondary infections by other pathogens, which significantly contribute to  
77 the morbidity of influenza (11).

78 Annual vaccination is the cornerstone of prevention against IVs. However, the vaccine has to  
79 be adapted yearly and does not always match with circulating strains. This is further  
80 complicated by the co-circulation of different IV types and different IAV subtypes (12). In the  
81 2017 to 2018 United States season, vaccine effectiveness was estimated to be only ~25%  
82 against influenza A subtype H3N2 viruses, which however comprised ~69% of infections (13).  
83 Antivirals represent an important second line of defense against IV, but all the currently  
84 available drugs are only efficient if taken at the early stages of the disease. Moreover, they  
85 inevitably exert selective pressure on the virus, which causes the appearance of drug-resistant  
86 variants (14-16). It results that there is an unmet need to develop novel therapies against IV.

87 Several studies indicate IFN  $\lambda$  as a promising therapeutic candidate to control influenza and  
88 other viral respiratory diseases (17, 18). The family of IFN  $\lambda$  (alias IFN type III) comprises IFN  
89  $\lambda$ 1, IFN  $\lambda$ 2 and IFN  $\lambda$ 3 (also known as IL-29, IL-28A and IL-28B, respectively) and the recently  
90 identified IFN  $\lambda$ 4 (19). Like IFN type I, IFN  $\lambda$  acts in an autocrine and in paracrine fashion,  
91 inducing an antiviral state through the expression of interferon-stimulated genes (ISGs), that

92 inhibit viral replication at multiple steps (20). The distinct tract of IFN  $\lambda$  is a circumscribed  
93 range of action, as the expression of its receptor is mostly restricted to the epithelial cell surfaces  
94 (21). Indeed, immune cells are largely unresponsive to IFN  $\lambda$  (21, 22). Thus, while IFN type I  
95 targets nearly all immune cells, creating massive inflammation that may further weaken the  
96 host (23), IFN  $\lambda$  only acts at the epithelial barriers and on few innate immune cells, without  
97 causing immunopathology (18, 24). These properties suggest IFN  $\lambda$  as a treatment of choice  
98 against acute viral infections, such as influenza, with a higher tolerability than IFN type I. IFN  
99  $\lambda$  plays a critical early role, not shared by IFN type I, in protection of the lung following IV  
100 infection (25-28) and several *in vivo* studies show that it also exerts variable degrees of antiviral  
101 activity against both IAV and IBV strains (29). It has been reported that, in B6.A2G-MX1 mice  
102 infected with H1N1 IAV, IFN  $\lambda$  intranasal administration prevents viral spread from the upper  
103 to the lower airway, without noxious inflammatory side effects (26, 30). Importantly human  
104 pegylated IFN  $\lambda$ 1 passed both phase I and II clinical trials for hepatitis C treatment, displaying  
105 an attractive pharmacological profile (31, 32).

106 Combination therapy is considered a valuable approach to provide greater clinical benefit,  
107 especially to those at risk of severe disease. Combining drugs targeting different mechanisms  
108 of viral replication may increase the success rate of the treatment (33, 34), as also demonstrated  
109 in our previous work, showing that IFN  $\lambda$ 1 co-administration delays the emergence of H1N1  
110 IAV resistance to oseltamivir (35). We recently developed 6'SLN-CD [heptakis-(6-deoxy-6-  
111 thioundec)-beta-cyclodextrin grafted with 6'SLN(Neu5Ac-a-(2-6)-Gal-b-(1-4)-GlcNAc;6'-N-  
112 Acetylneuraminyl-N-acetyllactosamine](36) a non-toxic anti-influenza antiviral designed to  
113 target and irreversibly inactivate extracellular IV particles, preventing their entrance into the  
114 host cell. 6'SLN-CD significantly decreases IAV replication in both *ex vivo* and *in vivo* models  
115 of infection (36). However, 6'SLN-CD targets the globular head of IV HA, which undergoes  
116 constant antigenic drift, thus posing a concrete problem of resistance emergence [14a]. In this  
117 work we chose to combine human IFN  $\lambda$ 1, the host frontline defense against IAV, with 6'SLN-

118 CD, in order to increase its effect and lower the chances of antiviral resistance. The two  
119 compounds hinder viral replication on different fronts: IFN  $\lambda$ 1 boosts the host innate response  
120 while 6'SLN-CD traps and inactivates newly formed virions. To mimic the *in vivo* environment,  
121 we assessed the combinatorial effect of the compounds in 3D human airway epithelia (HAE)  
122 reconstituted at the air-liquid interface (11, 37) and showed that IFN  $\lambda$ 1 enhances 6'SLN-CD  
123 antiviral activity. HAE perfectly mimic both the pseudostratified architecture of the human  
124 respiratory epithelium, composed of basal, ciliated, and secretory cells, and its defense  
125 mechanisms. In addition, they allow the use of clinical viral specimens thus preserving their  
126 original pathogenicity and biological characteristics, which are inevitably lost upon repeated  
127 passages in cell lines (37-40).

128 As host cellular heterogeneity strongly impacts virus-host interplay and is mirrored in the  
129 response to antiviral treatments (41, 42), we investigated the mechanism of action of IFN  $\lambda$ 1  
130 plus 6'SLN-CD by single cell RNA sequencing (scRNA-seq). This approach allowed us to trace  
131 the landscape of the modifications through which individual cells respond to IAV infection and  
132 to the treatments. We found that in different epithelial cell types, both the individual and the  
133 combined antivirals hinder viral replication to different extents, depending on the  
134 permissiveness of the cells to H1N1. We also showed that each basal, secretory and ciliated  
135 cells comprise multiples subclusters, whose proportions are altered by the infection.  
136 Surprisingly even though in each cell type the antivirals reduced viral replication synergistically,  
137 they were not able to restore the changes in cell subcluster composition in a similar manner.  
138 Lastly, in absence of infection, IFN  $\lambda$ 1 + 6'SLN-CD did not alter the proportions of the main  
139 epithelial cell types, further supporting the therapeutic potential of the formulation. The  
140 findings presented in this work pave the way to future *in vivo* experiments, to better assess the  
141 efficacy of IFN  $\lambda$ 1 + 6'SLN-CD treatment against influenza. To the best of our knowledge this  
142 is the first study investigating the effectiveness of an antiviral treatment by scRNA-seq.

143

144 **2. Results**

145

146 **2.1 IFN  $\lambda$ 1 and 6'SLN-CD display synergistic activity against H1N1 IAV *ex vivo*.**

147

148 We optimized an IFN  $\lambda$ 1/6'SLN-CD formulation to inhibit IAV in *ex vivo* 3D HAE. The tissues  
149 were infected with a clinical A/Switzerland/3076/2016 H1N1 strain that has not been passaged  
150 in cell lines, to exclude any *in vitro* adaptation bias. First, we determined the best administration  
151 mode of the individual treatments. While 6'SLN-CD successfully inhibited viral replication  
152 when administered at 8 hours post infection (hpi) on the apical surface of the HAE, IFN  $\lambda$ 1  
153 reduced viral spread only when administered at 24h before infection (hbi), and on the basal side  
154 of the tissue (**Figure S1**). Even though IFN  $\lambda$  pre-treatment is not an ideal clinical option, our  
155 data are in line with already published *in vitro* and *ex vivo* studies, confirming the effectiveness  
156 of IFN  $\lambda$  only in pre-treatment and on the basal side of polarized epithelial tissues (43, 44). The  
157 underlying reason for that is the mechanism of action of IFN  $\lambda$  and its kinetic. Unlike 6'SLN-  
158 CD, which directly targets the virus and inactivate it within minutes (36), the antiviral state  
159 induced by IFN  $\lambda$  relies on the activation of a gene expression program which takes several  
160 hours to be effective. Of note, in mouse models of infection, IFN  $\lambda$  prevents IV spread when  
161 administered via the intranasal route in therapeutic use, i.e. once the clinical symptoms of the  
162 disease are manifested, which would correspond to an administration at the apical side in our  
163 settings (26, 30). The discrepancy of IFN  $\lambda$  antiviral effects between *in vivo* and *ex vivo* systems  
164 is due to the lack of immune cells in the latter. *In vivo*, IFN  $\lambda$  is sensed by the transepithelial  
165 dendritic cells of the respiratory mucosa, which strongly amplify its signal (45).

166 Based on these observations and to achieve the maximum combinatorial antiviral effect, we  
167 administered 6'SLN-CD and IFN  $\lambda$ 1 according to the following protocol: HAE were first  
168 treated on their basal side with IFN  $\lambda$ 1, starting at 24 hbi, while 6'SLN-CD was administered  
169 at 8 hpi on the apical side of the tissue. Both IFN  $\lambda$ 1 and 6'SLN-CD were then co-administered

170 daily up to 72 hpi (**Figure 1A**). The quantification of viral replication at both 48 and 72 hpi, by  
171 measuring the viral particles released from the apical surface of the tissues, revealed that when  
172 administered in combination IFN  $\lambda$ 1 and 6'SLN-CD were more effective than when  
173 administered individually. The synergistic effect was evident at 48 hpi ( $\geq 1$  log reduction for  
174 both individual treatments vs  $> 2$  log reduction for the combined one) and it persisted at 72 hpi,  
175 when the antiviral effect of the individual treatments was lost (**Figure 1B**). Of note, IFN  $\lambda$ 1 and  
176 6'SLN-CD are non-toxic nor as individual (32, 36), nor as combined treatments (**Figure S2**).  
177 These data indicate that IFN  $\lambda$ 1 treatment potentiates the antiviral action of 6'SLN-CD.

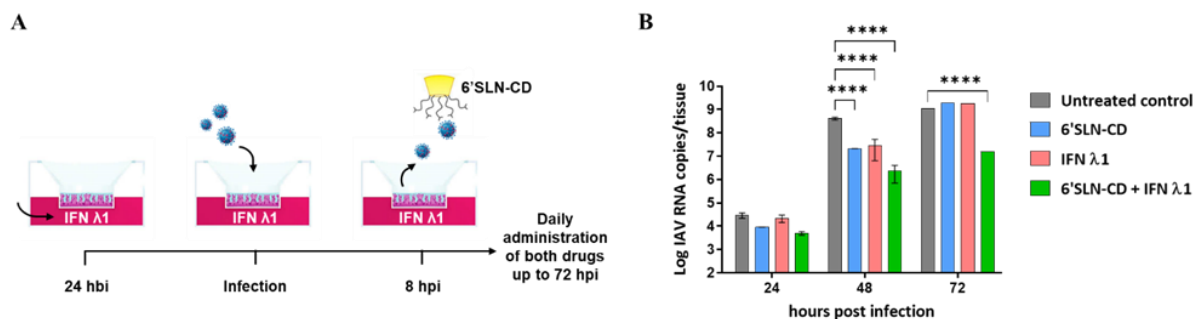

178 **Figure 1.** Combinatorial effect of 6'SLN-CD + IFN  $\lambda$ 1 in HAE. **A**) Schematics of 6'SLN-CD and IFN  $\lambda$ 1 (60  $\mu$ g  
179 and 5.5 ng per tissue, respectively) combined administration. **B**) Bar plot showing the kinetic of IAV replication  
180 in HAE treated with 6'SLN-CD only, or with IFN  $\lambda$ 1 only, or with both compounds according to A). The results  
181 represent three independent experiments conducted in duplicate in HAE developed from a pool of donors and  
182 infected with  $10^3$  RNA copies of clinical A/Switzerland/3076/2016 H1N1 (0 h corresponds to the time of viral  
183 inoculation). Viral replication was assessed measuring the apical release of IAV by RT-qPCR. \*\*\*,  $p \leq 0.001$ ;  
184 \*\*\*\*,  $p \leq 0.0001$ .

185

186

187 **2.2 scRNA-seq analysis reveals that the proportions of HAE basal, secretory and ciliated**  
188 **cells are not affected by IAV infection, nor by the antiviral treatments.**

189

190 In order to investigate at the molecular level the mechanism of action of IFN  $\lambda$ 1 + 6'SLN-CD  
191 and its effects on HAE, we performed scRNA-seq analysis on both non-infected and infected



192 tissues, administered or not with the individual or combined treatments. When conducting  
193 transcriptomic studies, it is essential to reach a fair compromise between viral and host gene  
194 expression. Viral replication occurs at the expenses of the host transcription machinery,  
195 resulting eventually in a complete host shutoff (46). Preventing the expression of cellular  
196 proteins at multiple steps is also a strategy adopted by the virus to counteract the antiviral  
197 response (47). We selected the time of 48 hpi as the most suitable to perform scRNA-seq in our  
198 acute infection model, as it provides a wide window of analysis of both viral and host genes.  
199 At 48 hpi viral replication is in the exponential phase (**Figure 1B** and (36)) resulting, however,  
200 in a still low cytopathic effect (11) and in ~ 10% infected cells, measured based on the  
201 expression of IAV nucleoprotein (NP) (**Figure S3**). Moreover, at this time point the advantage  
202 of the combined treatment is evident while individual treatments are still efficient, allowing to  
203 compare the therapeutic approaches with each other (**Figure 1B**). When correlating within the  
204 same HAE model, the number of IAV RNA copies measured from the apically released virus  
205 with the number of infected cells measured by FACS, we observed that the majority of the virus  
206 was produced by a small percentage of infected cells (**Figure S3 and 1B**). This finding is in  
207 line with previously published reports showing that between cells, there is a high level of  
208 variability in the outcome of IAV infection, which results from multiple sources of  
209 heterogeneity, such as the number of viral transcripts per cell, the antiviral response and the  
210 timing of the infection (48, 49).

211 sc-RNAseq relies on tissue dissociation, which can dramatically impact cell viability in  
212 epithelial tissues, as their survival is highly dependent on physical connections and  
213 communication between cells (50, 51). We established a dissociation protocol that allows to  
214 retrieve every cell type of the HAE (secretory, basal and ciliated cells, **Figure S4**) without  
215 compromising cell viability, thus preserving the quality of the mRNA within individual cells.

216 To perform scRNA-seq analysis, HAE were infected with IAV and treated or not with 6'SLN-  
217 CD, IFN  $\lambda$ 1, or with IFN  $\lambda$ 1 + 6'SLN-CD. To assess the perturbations induced by the



218 formulation in absence of virus, an uninfected control (mock) untreated and one treated with  
219 IFN  $\lambda$ 1 + 6'SLN-CD were included. Cells were partitioned for cDNA synthesis and barcoded  
220 using the Chromium controller system (10x Genomics), followed by library preparation and  
221 sequencing (Illumina). Sample demultiplexing, barcode processing and gene counting was  
222 performed using the Cell Ranger analysis software (52). Following the inspection of standard  
223 quality-control metrics, we selected barcodes having > 10.000 reads and < 15% of  
224 mitochondrial reads. The selection procedure resulted in 12.778 captured cells (~ 2.129 cells  
225 per condition). Of note, since our partitioning input was 4.000 cells per condition, the recovery  
226 rate was about 50%, which is in line with previously reported works (52).

227 The upper respiratory epithelium comprises several specialized cell types that likely respond to  
228 IAV infection in distinct ways (53). Using Seurat analytical pipeline, we performed an  
229 unsupervised graph-based clustering (54) on the Cell Ranger integrated dataset, comprising all  
230 the tested experimental conditions (**Figure 2A-C**). To match the identified clusters with the cell  
231 types found in the respiratory epithelium we used both cluster-specific and canonical marker  
232 genes (55) (**Figure 2B, D and S5A, B**).

233 In all analyzed HAE we identified five distinct clusters. Three of them corresponded to mature  
234 basal ( $TP63+/ITGA6+/KRT5^{high}/KRT17^{high}$ ), ciliated ( $FOXJ1+/PIFO+/TPPP3+$ ) and to a  
235 mixed population of secretory cells, including both goblet-mucous ( $MUC5AC+$ ) and club cells  
236 ( $SCGB1A1+/SCGB3A1+$ ) (**Figure 2A-D**). One cluster was made of a population of basal cells  
237 uniquely defined by high levels of *LY6D*, marker of cellular plasticity and differentiation (56)  
238 (**Figure 2A-D**). Like *in vivo*, also *ex vivo* HAE basal cells have both self-renewing and  
239 multipotent properties (57, 58). The current consensus is that in steady state conditions, basal  
240 cells differentiate first into secretory cells that in turn give rise to ciliated cells (59). However,  
241 after injury, ciliated cells can be directly generated by basal cells (59, 60). *LY6D*<sup>high</sup> basal cells  
242 were characterized by the co-expression of both basal and secretory hallmark genes, such as  
243 *KRT5*, *KRT17*, and *BPIFB1*, *SPRR3*, *AGR2* respectively (**Figure 2D**). This cluster was hence

244 identified as constituted by basal cells differentiating into secretory cells. The last cluster,  
245 consisting of 843 cells (6.6 % of the total selected cells), did not display a unique gene signature  
246 compared to the others, but co-expressed basal, secretory and ciliated hallmark genes (**Figure**  
247 **2D and S5B**). It was also marked by an increased number of gene counts in comparison to the  
248 other clusters (**Figure S5C**). We therefore concluded that this cluster likely resulted from  
249 doublets and excluded it from further analysis. These observed cell types and their proportions  
250 (**Figure 2E**) are consistent with previous scRNA-seq studies and indicate that our *ex vivo* model  
251 recapitulates the respiratory epithelium *in vivo* (61).

252 We next determined the relative abundances of ciliated, secretory, basal and differentiating  
253 basal cells across different conditions (**Figure 2E**). We found that nor the infection alone, nor  
254 the treatments in the presence or absence of the infection, induced substantial changes in the  
255 relative proportions of these main epithelial cell types (**Figure 2E**). IAV causes a strong  
256 cytopathic effect which results in a significant loss of ciliated cells and important alterations of  
257 the tissue structure. However, in our HAE infection model this phenomenon occurs only at 120  
258 hpi and it is therefore not evident at 48 hpi (11), which explains our results.

259

260

261A

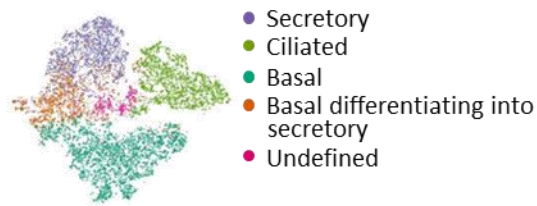

B

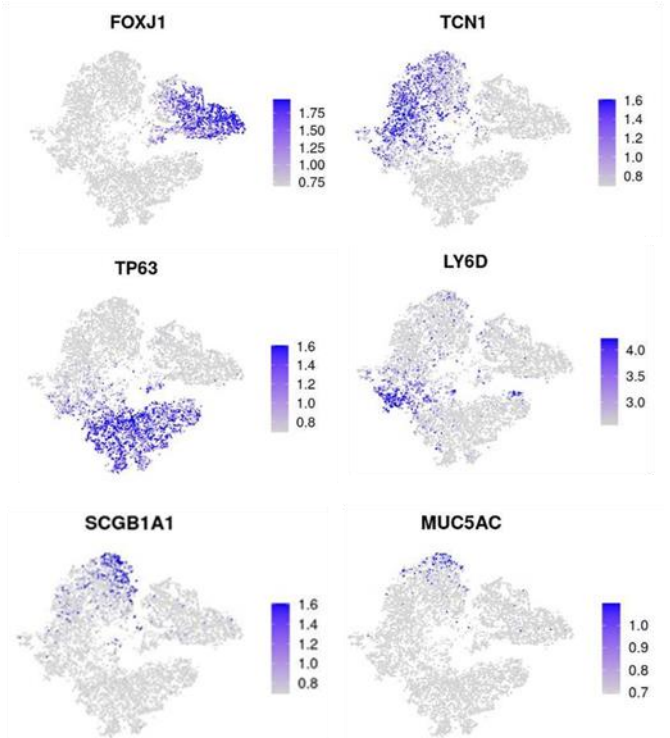

C

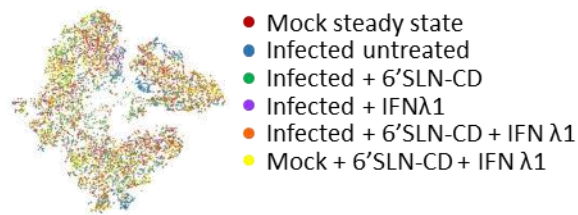

D

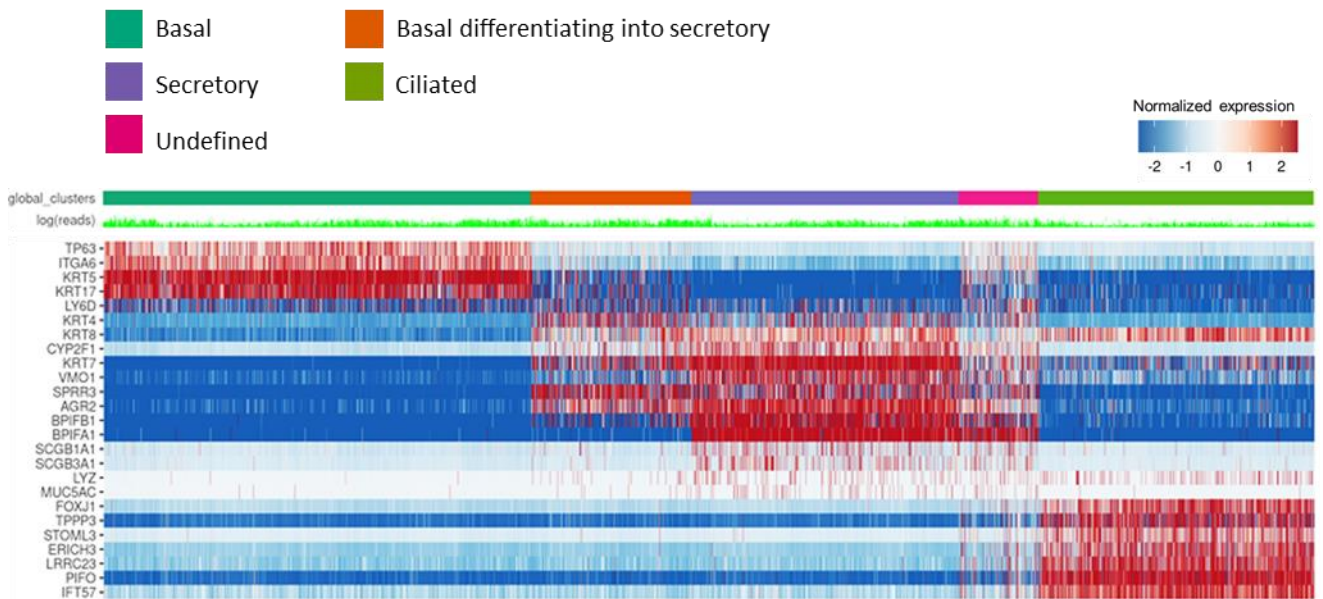

E

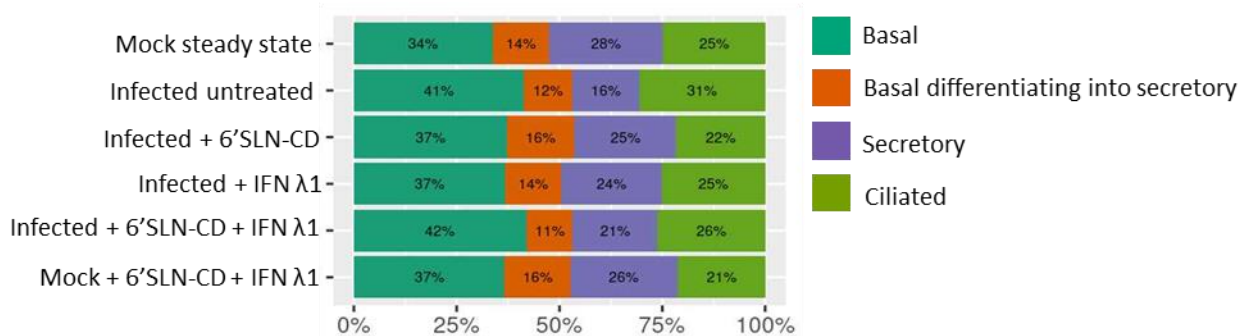

262 **Figure 2.** Analysis of HAE cell diversity. **A)** t-distributed stochastic neighbor embedding (t-SNE) visualization of  
263 the major cell types composing human HAE. Individual cell types were annotated using a combination of graph-  
264 based clustering results from Seurat and expression analysis of several canonical cell type-specific markers. The  
265 t-SNE plots shown in panels A-C are presented in the same spatial orientation (i.e. the location of cells expressing  
266 the canonical markers in figure B corresponds to the location of the specific cell types in panel A). **B)** t-SNE plots  
267 illustrating in blue the expression patterns of some of the canonical markers used to annotate the three main airway  
268 epithelial cell types: *FOXJ1* for ciliated cells, *TCN1* for all secretory cells, *TP63* for basal cells, *LY6D* for  
269 differentiating cells, *SCGB1A1* for club cells and *MUC5AC* for goblet cells; scale bars are Log2. **C)** t-SNE  
270 visualization of the scRNA-seq data for all single cells in the following conditions: mock steady state, infected  
271 untreated (infected with A/Switzerland/3076/2016 H1N1 strain), infected + 6'SLN-CD, infected + IFN  $\lambda$ 1, infected  
272 + IFN  $\lambda$ 1 + 6'SLN-CD, and mock + IFN  $\lambda$ 1 + 6'SLN-CD. **D)** Heatmap representing the gene expression profiles  
273 of 12,778 single cells from human HAE grouped into five clusters. Expression values are Pearson residuals from  
274 SCTransform binomial regression model [70] fitted to UMI counts (see Methods). The cells were clustered solely  
275 on the expression of the shown hallmark genes. **E)** bar graph showing the relative percentage of each main  
276 epithelial cell type described above in each experimental condition described in C).

277

### 278 **2.3 The antiviral treatments affect IAV replication to different extents across different** 279 **HAE cell types.**

280

281 We next asked how viral transcripts would distribute across cell type clusters, in each  
282 experimental condition. Global analysis of both host and viral transcriptomes in all 11,935 cells  
283 revealed that at 48 hpi and in absence of treatments, IAV transcripts were detected in all cell  
284 types and were more abundant in ciliated cells, followed by secretory cells, basal differentiating  
285 into secretory and lastly, by basal cells (**Figure 3A** and **S6**). Basal cells are located in the lower  
286 part of the epithelium, do not reach the apical side and are therefore physically protected from  
287 the virus in the first stages of the infection, when the ciliated cell layer is preserved (37).  
288 Secretory cells have been shown to be the immediate target of IAV (11, 62), while ciliated cells  
289 become preferentially infected at later stages of infection (63, 64). Nonetheless, we asked

290 whether the different numbers of viral transcripts between secretory and ciliated cells relied  
291 also on the expression levels of host factors involved in IV infection. We measured in steady  
292 state conditions the average mean expression of twelve cellular genes promoting multiple steps  
293 of IV replication (65), in secretory (including basal differentiating into secretory) vs ciliated  
294 cells (**Figure S7**). We found that secretory cells express higher levels of genes involved in IV  
295 RNA replication, such as CD151 (66) and HMGB1 (67), or in viral maturation and release like  
296 TMPRSS4 (67) and Rack1 (68). While ciliated cells express higher levels of CLTA(69) and  
297 EPS8 (70), necessary for viral endocytosis and uncoating (**Figure S7**). These data better explain  
298 the higher susceptibility to IAV infection of ciliated over secretory cells.

299 Compared to the mock steady state, in the 6'SLN-CD alone condition all main epithelial cell  
300 types displayed a decreased number of viral transcripts. Even so, this reduction was more  
301 pronounced in secretory (~ 11-fold reduction) and in basal cells differentiating into secretory  
302 cells (~ 5-fold reduction), rather than in ciliated cells (~ 3.5-fold reduction) (**Figure 3A**). In the  
303 presence of IFN  $\lambda$ 1 alone, IAV transcripts were only detected in ciliated cells indicating,  
304 similarly to 6'SLN-CD, a greater reduction of viral replication in the non-ciliated compartment  
305 compared to the ciliated one (**Figure 3A**). Almost no viral reads were detected in the 6'SLN-  
306 CD + IFN  $\lambda$ 1 condition, independently of the epithelial cell types (**Figure 3A**). Accordingly, in  
307 the presence of both treatments the number of infected cells measured by FACS accounted for  
308 less than 1% of the total epithelium (**Figure S3**). These results further confirmed the synergistic  
309 action of IFN  $\lambda$ 1 and 6'SLN-CD and shed light on the cell type-specific effects of the treatments.

310 Interestingly, in presence of 6'SLN-CD alone viral replication was hindered preferentially in  
311 secretory rather than in ciliated cells. This difference was probably determined by both IAV  
312 receptor specificity and the higher susceptibility to the infection of ciliated cells, which explains  
313 the stronger reduction of viral replication observed in secretory cells. A similar explanation is  
314 also plausible for the different extents of viral replication measured across ciliated and secretory  
315 cells in the condition IFN  $\lambda$ 1 alone. We asked whether secretory cells mounted a stronger

316 immune response compared to ciliated cells and measured, in both cell types, the average mean  
317 expression of several key ISGs, *OAS*, *MX1*, *MX2*, *IFIT1*, *IFIT2*, *ISG15* and *ISG20* (20), across  
318 different experimental conditions. We did not observe significant differences, nor in the basal  
319 gene expression levels, nor in the induction upon infection or IFN  $\lambda$ 1 stimulation (data not  
320 shown).

321 Lastly, we investigated the expression levels of IAV mRNA segments and we observed the  
322 following viral mRNA segment ratio: NEP > M2 > HA ~ NP > NA > M1 ~ NS1 > PA ~ PB1  
323 ~ P2 (**Figure 3B**). The fractions of individual viral genes did not change across the treatments  
324 (**Figure 3B**), nor across epithelial cell types (data not shown). The spliced transcripts (M2 and  
325 NEP) had higher expression level compared to the unspliced transcripts (M1 and NS1). This  
326 finding is in line with previous reports showing that the expression of both M2 and NEP is more  
327 biased toward the later stages of viral replication, such as 48h hpi (64, 71).



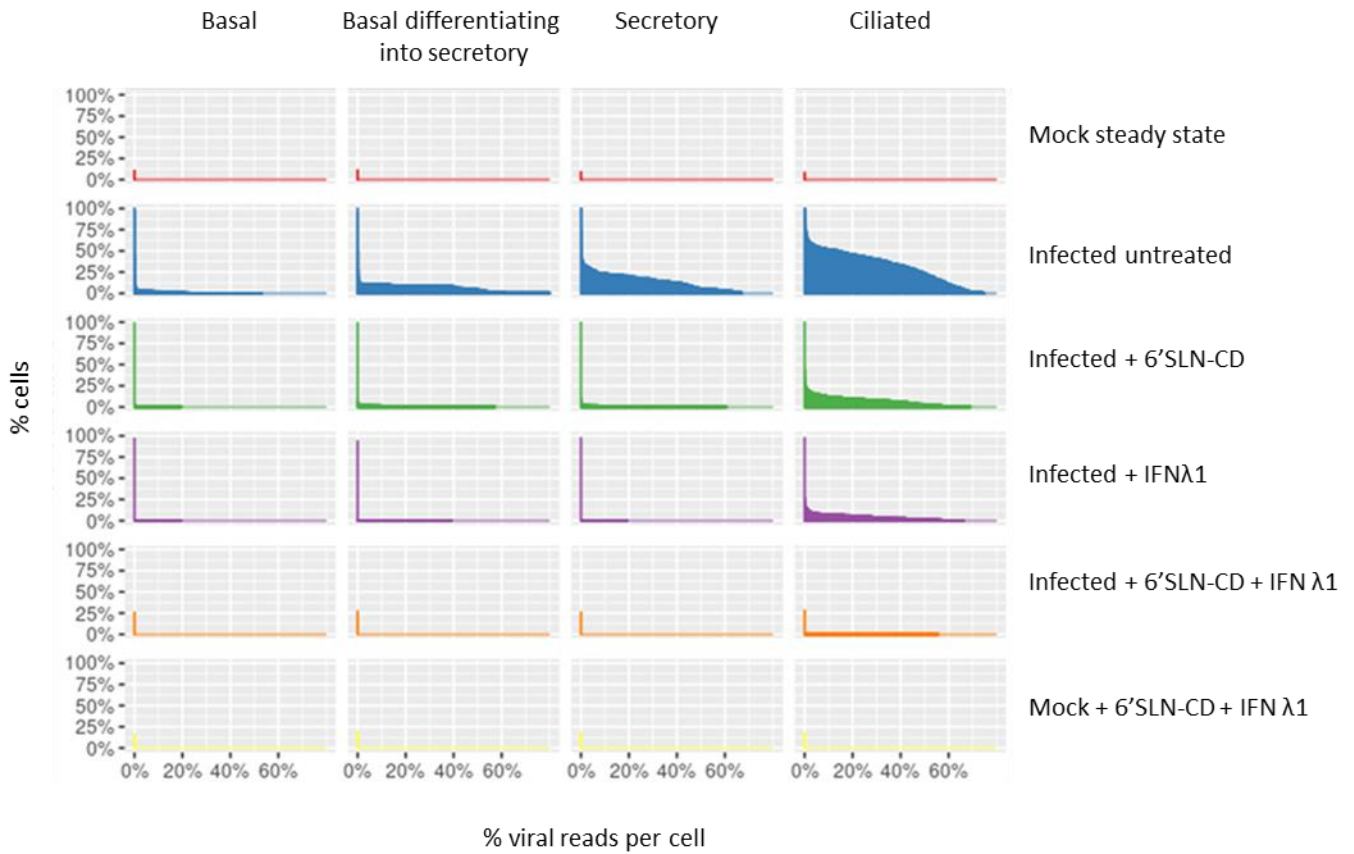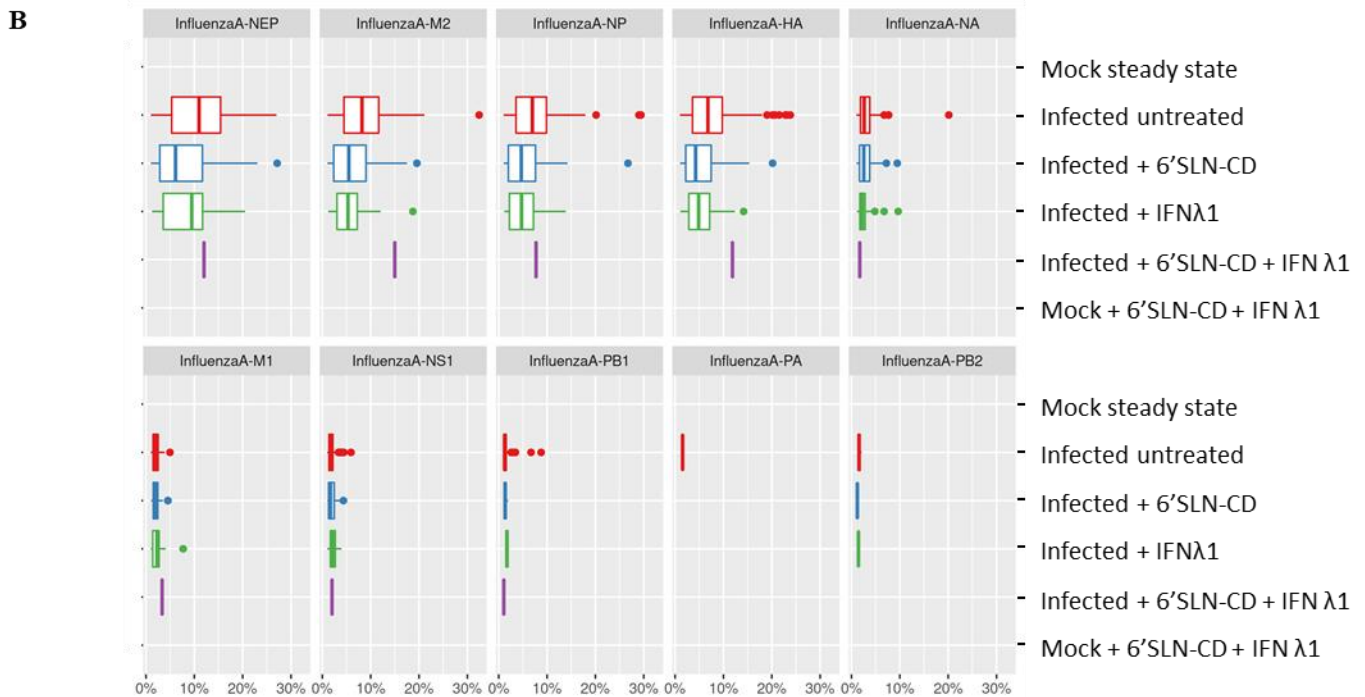

328

329 **Figure 3. A)** Distribution of IAV transcripts across cells having more than 1% of viral reads in different HAE cells

330 clusters and across different experimental conditions. **B)** Box plot summarizing the relative fraction of viral mRNA

331 for each IAV gene segment across all experimental conditions. Conditions as specified in figure 2C.



332

333 **2.4 scRNA-seq analysis reveals cell type specific responses to the infection and to the**  
334 **treatments within each HAE cell cluster.**

335

336 We then sighted to further investigate the heterogeneous cell responses to IAV infection and to  
337 the treatments within each epithelial cell cluster. As they represent a continuum of  
338 differentiation, the “basal differentiating into secretory” and “secretory” clusters were merged.  
339 Individual clustering (54) was performed analyzing each main HAE cell type independently of  
340 the others, and led to the identification of several subpopulations, or subclusters.

341 Basal cells were distributed across six subclusters annotated as follows: b1) steady state  
342 basal cells; b2) & b3) *LY6D*<sup>+</sup> differentiating cells (55), with b3 displaying a more pronounced  
343 expression of *KRT14* and *KRT16*, markers of tissue repair and regeneration (72, 73); b4) highly  
344 proliferating cells, based on strong expression levels of genes involved in cell cycle progression  
345 such as *MIKI67*, *CDK1* and *BIRC5*; b5) proliferating cells with lower levels of cell cycle  
346 progression genes, compared to b4, but with high levels of *KRT14*<sup>high</sup> and lastly b6) inflamed  
347 cells, based on high expression of *CXCL10*, *CXCL11* and several others ISGs (**Figure 4A** and  
348 **S8A**). The latter subcluster was the less represented in the mock steady state control, while it  
349 became the most abundant in the infected untreated condition (16-fold increase), with an  
350 inflammation signature stronger than that induced in the other subclusters (**Figure 4A and S8A**).  
351 IAV induced the expression of pro-inflammatory cytokines across all basal subpopulations.  
352 6'SLN-CD and IFN  $\lambda$ 1, administered alone or in combination, counteracted this effect (**Figure**  
353 **S8A**). Similarly, the b6 inflamed cluster was decreased by 3-fold by the individual treatments  
354 and by 9-fold by the combined formulation. In turn, the levels of differentiating basal clusters  
355 (b2 and b3), which were decreased by the infection (2-fold and 3-fold decrease for b2 and b3,  
356 respectively) were also restored by the antivirals. In line with previous reports (74), IAV  
357 infection also reduced the b4 highly proliferating subcluster (2.8-fold decrease), which was not

358 recovered by the individual, nor by the combined treatments (**Figure 4A**). This may also result  
359 from the inflammatory response triggered by IFN  $\lambda$ 1, as b4 is less abundant also in the mock  
360 double treated, compared to the mock steady state (2-fold decrease). On the other hand, the b5  
361 low proliferating cells cluster did not undergo significant changes across the tested  
362 experimental conditions.

363 Of note, as they are not a direct target of IAV (**Figure 3A and S6**), basal cells mainly contributed  
364 to the immune reaction against the virus as bystander cells (75). Thus, all the changes induced  
365 by IAV in this epithelial compartment were largely independent of viral replication.

366 Within the ciliated compartment we identified four subclusters: c1) steady state cells with  
367 high expression of ciliated hallmark genes *FOXJ1*, *TPPP3*, and *ERICH3*; c2) immature cells,  
368 based on lower levels of the ciliated hallmark genes, and on higher expression of *RAB11FIP1*,  
369 which is involved in primary ciliogenesis (76); c3) *IFN* - inflamed cells and c4) *IFN* + inflamed  
370 cells, both characterized by high expression of inflammatory genes, such as *ISG20* and *GBP1*,  
371 but differing from each other based on the expression of *IFN*  $\lambda$  and *IFN*  $\beta$ 1 (**Figure 4B** and  
372 **S8B**).

373 Ciliated cells are highly permissive to IAV infection (63). Analysing the distribution of viral  
374 transcripts, we found that viral replication occurred across all ciliated subclusters (**Figure S8B**).  
375 However, c4 displayed the highest levels of IAV segments, resulting in 100% of infected cells  
376 (**Figure S8B**). The viral load correlated with the entity of the inflammatory response, as only  
377 c4 expressed *IFN*  $\lambda$  and *IFN*  $\beta$ 1 genes, as well as high levels of *NEDD9*, which is associated  
378 with IAV-induced antiviral response (77). Moreover, compared to all other clusters, c4  
379 exhibited high levels of the pro-apoptotic factor *BBC3*, and lower or null levels of ciliated  
380 hallmark genes, probably as a result of the massive viral genes expression, hijacking the host  
381 transcriptional machinery (46) (**Figure S8B**). The changes in the proportions of ciliated cells  
382 subclusters across experimental conditions reflected the efficacy of the treatments. Compared  
383 to the mock steady state control, IAV infection resulted in a relative decrease of both the steady

384 state and immature cells (2.6-fold reduction of c1 and 2.1-fold reduction of c2, respectively),  
385 whose levels were restored by both individual and combined treatments (**Figure 4C**). In line  
386 with that, 6'SLN-CD and IFN  $\lambda$  1 counteracted the increase in the c3 inflamed IFN- subcluster  
387 (**Figure 4C**). The C4 inflamed IFN+ subpopulation followed a similar trend, but completely  
388 disappeared in the 6'SLN-CD + IFN  $\lambda$  1 condition, further proving the combinatorial effect of  
389 the two compounds. Interestingly in the mock treated condition, the inflamed IFN - cluster was  
390 increased compared to the mock steady state but not the inflamed INF +, indicating that the  
391 latter represents a virus-specific signature at 48 hpi (**Figure S8B**).

392        Secretory cells were classified in three subclusters: s1) steady state secretory cells  
393 comprising a mixed population (defined as “mixed” because the gene expression profiles did  
394 not allow unambiguous classification) of mainly club cells and fewer goblet cells, displaying  
395 high expression of *SCGB1A1*, *SCGB3A1*, *MUC5AC*, *RARRES1* and *LCN2*; s2) *SCGB3A1*-  
396 */TP63*- basal differentiating into secretory cells, initially described in Figure 2), expressing both  
397 secretory markers, such as *BPIFB1*, *ATP12A* and basal markers, like *KRT5*, *KRT17* and  
398 *CYP1B1*, which is exclusive of basal differentiating cells together with *LY6D* (55)) and s3)  
399 secretory cells differing from s2) based on lower expression of *RARRES1* and higher expression  
400 levels of ISGs (**Figure 4C** and **S8C**).

401 IAV infection triggered the expression of pro-inflammatory cytokines in all secretory  
402 subpopulations, however this effect was stronger in the s3 subcluster, whose fraction was  
403 increased by 3.6-fold, at the expenses of the others (**Figure 4C** and **S8C**). Secretory cells  
404 represent the second target of IAV after ciliated cells. Viral reads distribution analysis across  
405 subclusters showed that IAV preferentially infected mature rather than basal differentiating into  
406 secretory cells (**Figure 3A** and **S8C**). We did not observe an additive effect of the treatments  
407 in secretory cells: compared to the infected untreated condition, IFN  $\lambda$ 1 alone decreased the  
408 fraction of s3 inflamed cells by only 1.8-fold, while 6'SLN-CD alone restored the secretory  
409 subclusters composition as effectively as the combined treatments. This is probably due to the

410 fact that similarly to basal cells, most of the changes occurring in secretory cells after IAV  
411 infection were largely independent of viral replication.

412 Our findings show that IAV infection alters the subclusters composition in epithelial cell type  
413 by inducing the appearance of inflamed populations. As the inflammatory response tightly  
414 correlates with the viral load, the ability of the antiviral treatments to restore the tissue  
415 composition to the steady state level is stronger in infected rather than in bystander epithelial  
416 cell types.

417

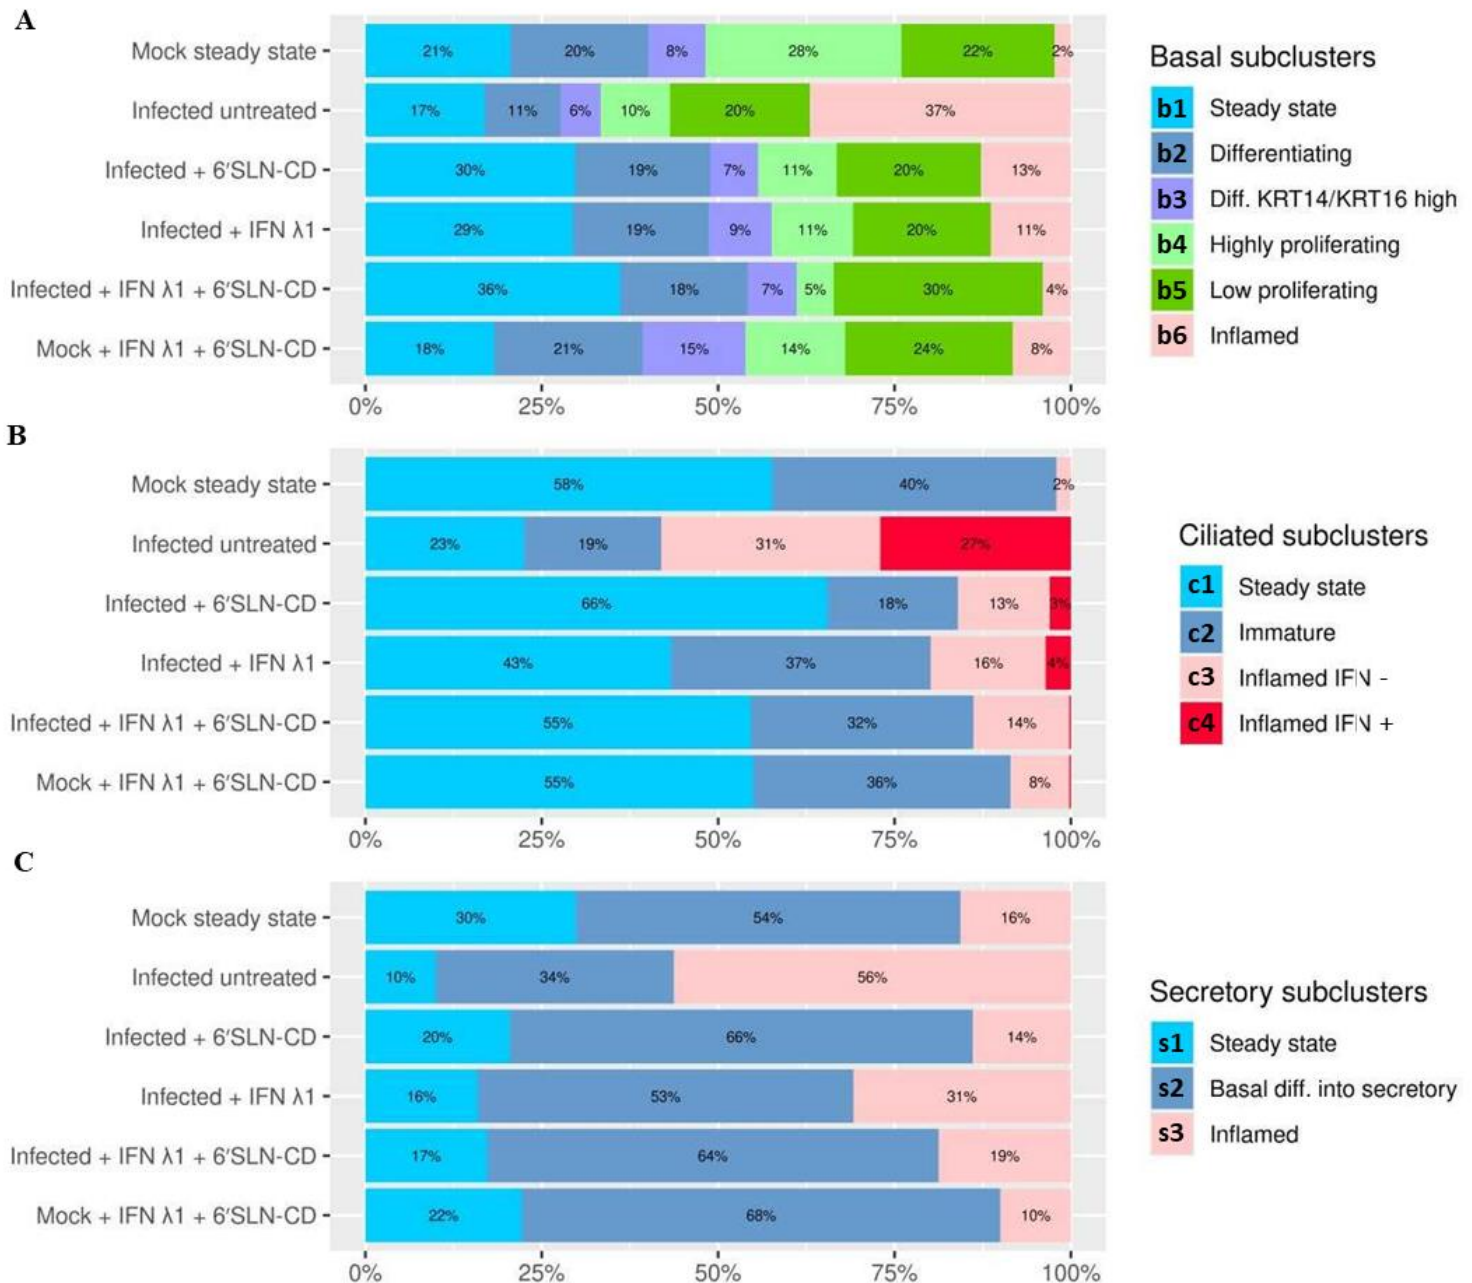

418

419 **Figure 4.** Stacked bar graph showing the relative percentages of HAE basal **A**), ciliated **B**) and secretory cells **C**)

420 subclusters across experimental conditions. “Diff.” stands for “differentiating”. Conditions as specified in figure

421 2C.

422

423

424

425

426

427

428

### 429 **3. Discussion**

430

431 Influenza can be a dreadful disease, with a strong socio-economic impact worldwide. Current  
432 antiviral strategies are only efficient at the early stages of the infection and are challenged by  
433 the genomic instability of the virus. We are in need for novel antiviral therapies targeting the  
434 respiratory immune defense to improve viral clearance, reduce the risk of bacterial super-  
435 infection, and attenuate tissue injury. A treatment that would prevent viral entry and at the same  
436 time boost the host antiviral response without causing immunopathology would thus represent  
437 an ideal tool to prevent or treat influenza infection. With this in mind, we assessed the antiviral  
438 potential of co-administering human IFN  $\lambda 1$  with 6'SLN-CD against H1N1 IAV in *ex vivo*  
439 HAE. The IFN  $\lambda 1$  + 6'SLN-CD formulation is non-toxic and more effective in reducing viral  
440 replication, compared to the individual treatments. IFN  $\lambda 1$  has been already used in clinical  
441 trials against viral infections, while 6'SLN-CD is well tolerated *in vivo* and effectively  
442 constrains the spread of IV infection when administered topically (36). Overall, our data support  
443 a prospective therapeutic application of IFN  $\lambda 1$  + 6'SLN-CD.

444 We next sought to investigate the mechanism of action of this formulation by scRNA-seq in  
445 HAE. Transcriptomic analysis unraveled the heterogeneous composition of each main epithelial  
446 cell type, which is an assortment of subclusters with unique gene expression programs  
447 underlying different cell states. Besides terminally differentiated cells we also identified basal  
448 differentiating into secretory cells. This subpopulation, roughly equally represented across  
449 experimental conditions, derived from the continuous differentiation process occurring in the  
450 respiratory epithelium. We did not find basal cells differentiating directly into ciliated cells, a  
451 process triggered by tissue injury (58, 78, 79), because in our settings the cytopathic effect

452 induced by IAV at 48 hpi is not strong enough to significantly alter the architecture of the tissues  
453 (11). We also did not observe secretory cells differentiating into ciliated cells <sup>[54-56]</sup>, probably  
454 due to the limitations in sequencing depth and to the fact that we did not perform a lineage study  
455 (57), which would be beyond the scope of this work. When we measured the distribution of  
456 viral reads across the main cell types, we found that IAV preferentially infected epithelial cells  
457 in the following order: ciliated, secretory and basal cells. Accordingly, ciliated cells mounted a  
458 stronger inflammatory response compared to secretory cells which, in turn, expressed ISGs and  
459 innate cytokines at higher levels than basal cells. Interestingly, only within the ciliated  
460 compartment, IAV induced the appearance of highly inflamed cells characterized by a  
461 distinctive high expression of IFN type I and type III genes. Basal cells, which were the most  
462 diverse due to their multipotent potential, displayed extremely low levels of viral transcripts  
463 and participated to the tissue immune response as bystander cells. Of note, the infection of basal  
464 cells would be highly detrimental to the host as these cells are absolutely necessary to maintain  
465 the barrier of the respiratory epithelium by regenerating secretory and ciliated cells targeted by  
466 IV (79). We observed that the proportions of the main HAE cell type clusters did not change  
467 upon infection and/or treatments which is, as explained above, due to the poor cytopathic effect  
468 induced by IAV at 48 hpi (11). On the other hand, the subcluster composition of each cell type  
469 underwent significant modifications in response to the infection, mostly resulting from the  
470 appearance of inflamed cells. These changes were induced in ciliated and to some extent in  
471 secretory cells, by a direct cell response to viral replication and in basal cells by the response  
472 to the paracrine signaling from infected cells.

473 We observed that the individual treatments reduced the percentage of viral transcripts to  
474 different extents across epithelial cell types: both 6'SLN-CD and IFN  $\lambda$ 1 alone caused a  
475 reduction of viral reads more pronounced in secretory rather than in ciliated cells. This finding  
476 was unexpected for 6'SLN-CD, which is designed to exclusively target extracellular viral  
477 particles and was evenly distributed throughout the apical side of the HAE. We reasoned that



478 the effect of the 6'SLN-CD in reducing viral replication depends on the susceptibility of the  
479 cells to the infection, which is dictated by both the distribution of  $\alpha$  2,6-linked Sia and the  
480 expression of host factors necessary for viral entry. As IAV infects ciliated cells more easily  
481 than secretory cells, the number of viral transcripts is lower in the latter cell type and in turn,  
482 its reduction in response to 6'SLN-CD is more pronounced, compared to that observed in  
483 ciliated cells.

484 Viral transcript distribution analysis also indicated a synergistic effect between 6'SLN-CD and  
485 IFN  $\lambda$ 1 in each main cell type. However, the capacity of the combined treatments to revert IAV-  
486 induced perturbations in subclusters composition was greater than the individual ones only in  
487 ciliated cells, where the inflammation was a direct consequence of viral replication and in basal  
488 cells, but only limited to the inflamed subcluster. In line with that, in the basal compartment  
489 where changes in cell composition were independent of IAV infection, nor the individual nor  
490 the combined treatments succeeded in restoring the number of highly proliferating cells.

491 Lastly, in absence of infection, the combined treatment did not alter the ratios between the main  
492 basal, ciliated and secretory cells clusters, but changed the subclusters abundances within each  
493 of them, resulting in an increase in inflammatory cells which was likely induced by IFN  $\lambda$ 1.

494

495 Different macromolecules-based approaches are currently available for the treatment of viral  
496 infections. However, a deep knowledge of the impact on the host cells is needed to increase the  
497 effectiveness of these therapies, minimize the side effects and reduce the toxicity. Our study,  
498 proposing scRNA-seq to assess the effects of a combined therapy against IV, is in line with this  
499 need and to the best of our knowledge is the first to present such analytical approach. We  
500 suggest that the ability of an antiviral treatment to restore epithelial cell subclusters composition  
501 upon infection is an important parameter to dissect the effects of the drug on the host cells,  
502 beyond its capacity to impair viral replication. This work is also the first in addressing at the  
503 molecular level the anti-IAV effects of IFN  $\lambda$  in HAE. Additional investigations in more

504 relevant *in vivo* models of infection, such as mice or ferrets, will be necessary to further assess  
505 the efficacy of IFN  $\lambda 1 + 6'SLN$ -CD formulation and its genetic barrier to antiviral resistance.  
506 Also, in light of the ongoing differentiation process occurring in the respiratory epithelium,  
507 scRNA-seq velocity analysis (80) could allow to investigate the trajectories of both basal and  
508 secretory cells differentiation, as well as how such trajectories would be perturbed by the  
509 infection and the treatments.

510

## 511 **5. Materials and Methods**

512

513 *Human airway epithelia (MucilAir™)*: the human airway epithelia used in this study were  
514 reconstituted from freshly isolated primary human nasal polyp epithelium collected either from  
515 14 different donors, upon surgical nasal polypectomy, either from individual donors, as  
516 previously described (11). The patients presented with nasal polyps but were otherwise healthy,  
517 with no atopy, asthma, allergy or other known comorbidity. All experimental procedures were  
518 explained in full, and all subjects provided written informed consent. The study was conducted  
519 according to the Declaration of Helsinki on biomedical research (Hong Kong amendment,  
520 1989), and the research protocol was approved by the local ethics committee (11). The tissues  
521 were maintained at the air-liquid interface according to the manufacturer's instructions (11).

522

523 *Viral stocks and compound*: influenza H1N1 A/Switzerland/3076/16 clinical specimen was  
524 isolated from the nasopharyngeal swab of an anonymized patient, provided from the Geneva  
525 University Hospital. The sample was screened by one-step real-time quantitative PCR (qPCR)  
526 (81). Influenza A virus was subtyped by sequencing the NA gene as previously described (82).  
527 To prepare viral stocks, 100  $\mu$ l of clinical sample was inoculated at the apical surface of several  
528 HAE, for 4h at 33°C. After the infection the apical side of the tissues were washed five times  
529 with PBS. In order to measure the daily viral production, apical samples were collected every

530 24 h, by applying 200µl of medium for 20' at 33°C. The viral load of each time point was then  
531 measured by RT-qPCR and the 4 apical washes with highest titer were pooled and re-quantified.  
532 Aliquots were stored at -80°C.

533 Human recombinant IFN λ1 protein was obtained from R&D Systems, Inc. (Abingdon, United  
534 Kingdom). 6'SLN-CD was synthesized as described previously (36).

535 *HAE, viral infections and treatments:* HAE were infected apically with H1N1  
536 A/Switzerland/3076/16 strain (1e3 or 1e4 RNA copies/tissue), in a final volume of 100 µl as  
537 described above (83). Infected tissues were treated with 6'SLN-CD alone, IFN λ1 alone, or with  
538 6'SLN-CD plus IFN λ1. 6'SLN-CD dissolved in PBS was transferred on the apical surface of  
539 the tissues (60 µg/tissue, in a volume of 30ul), starting from 8 hpi. After each apical wash,  
540 performed for daily viral load quantification as described above, 6'SLN-CD was re-added on  
541 the apical side of the tissues. IFN λ1 was added on the basal side of the inserts (5.5 ng/tissue in  
542 550 µl) at one day before infection and then added every day, each time replacing the entire  
543 basal medium with fresh one. In parallel, upon each wash the infected untreated tissues were  
544 administered with 30 µl of PBS on the apical side, the same volume added to the tissues treated  
545 with 6'SLN-CD, while the basal medium was changed on a daily basis. The treatments were  
546 administered up to 72 hpi.

547 *Viral load quantification:* viral RNA was extracted from Mucilair apical washes using EZNA  
548 viral extraction kit (Omega Biotek) and quantified by using RT-qPCR with the QuantiTect kit  
549 (#204443; Qiagen, Hilden, Germany) in a StepOne ABI Thermocycler, as previously described  
550 (11). Viral RNA copies were quantified as follows: 4 ten-fold dilution series of *in vitro*  
551 transcripts of the influenza A/California/7/2009(H1N1) M gene were used as reference standard  
552 as previously described (11). CT values were converted into RNA load using the slope-intercept  
553 form. In all experiments, the slope, efficiency and R2 ranged between 0.96 and 0.99 (38, 84).  
554 *P values* were calculated relative to untreated controls using the two-way ANOVA with Prism  
555 8.0 (GraphPad, San Diego, CA, USA).

556 *Toxicity and viability assays:* non-infected tissues were treated with 6'SLN-CD plus IFN  $\lambda$ 1,  
557 in the same doses/volumes used for infected tissues (as described above). Accordingly, every  
558 day an apical wash was performed and a new dose of 6'SLN-CD was added on the apical side  
559 of the tissues, while fresh medium with IFN  $\lambda$ 1 was added on the basal side. Similarly, the  
560 untreated control tissues were administered with 30 $\mu$ l of PBS on their apical side, while the  
561 basal medium was replaced every day.

562 Lactate dehydrogenase (LDH) release in the apical medium was measured with the Cytotoxicity  
563 Detection Kit (Roche 04744926001) as described previously (36). Percentages of cytotoxicity  
564 were calculated compared to the cytotoxicity control tissues, which were treated with 100  $\mu$ l of  
565 PBS-5% Triton <sup>TM</sup> X-100 (Sigma Aldrich) on the apical side.

566 Cell metabolic activity was measured by adding MTT reagent (Promega), diluted in MucilAir  
567 medium (1 mg/ml), on the basal side of the tissues. After 3h at 37°C the tissues were transferred  
568 in a new plate and lysed with 1 ml of DMSO. Subsequently, the absorbance was read at 570  
569 nm according to manufacturer instructions. Percentages of viability were calculated by  
570 comparing the absorbance to the untreated control tissues.

571 *HAE enzymatic dissociation and flow cytometry analysis:* HAE tissues were first washed  
572 both apically and basally in DPBS without calcium and magnesium (Thermo Fisher Scientific)  
573 for 10' at 37°C. Then they were incubated with TrypLE (Thermo Fisher Scientific), both  
574 apically and basally for 30' at 37°C. During this time the tissues were dissociated with a 1ml  
575 pipette. Cells were harvested and washed with ice-cold MACS buffer (PBS without calcium  
576 and magnesium, EDTA pH 8, 2mM BSA 0.5%).

577 For scRNA-seq, cells were stained with Hoechst 33342 (Thermo Fisher Scientific) and DRAQ7  
578 (Biolegend) and analyzed with a MoFlo Astrios Cell Sorter (Beckman Coulter). Viable cells  
579 were defined as Hoechst +/DRAQ7-, doublets were excluded by gating for SSC-W vs SSC and  
580 single cells were sorted.

581 To determine the percentages of infected cells, upon HAE dissociation the cells were fixed/  
582 permeabilized using the Perm/Wash Buffer RUO (554723 BD Biosciences-US) and then  
583 stained with the primary antibody (mouse monoclonal anti-IVA Ab 1:100 dilution,  
584 Chemicon®) for 20' at 4°C. After a wash with Perm/Wash Buffer RUO the secondary Ab  
585 (Alexa Fluor 488 Invitrogen™, 1 :200) was added for 20' at 4°C. After one wash with MACS  
586 buffer the percentages of IAV infected cells were determined with a MoFlo Astrios Cell Sorter  
587 (Beckman Coulter) and the uninfected gating control was defined using uninfected cells stained  
588 with both the primary and the secondary antibodies.

589 *Single cell RNA sequencing of HAE:* upon HAE dissociation viable cells were sorted as  
590 described above. Cells were then counted using Countess™ II FL Automated Cell Counter  
591 (Invitrogen) and diluted to equivalent concentrations with an intended capture of 5000  
592 cells/sample, following the manufacturer's provided by 10x Genomics for the Chromium  
593 Single Cell platform. All subsequent steps through library preparation followed the  
594 manufacturer's protocol. Samples were sequenced on an Illumina HiSeq 4000 machine.

595 *Computational analysis of scRNA-seq data:* upon demultiplexing and performing the routine  
596 quality checks on the raw reads, we processed the data via Cell Ranger version 3.1.0 using the  
597 union of human and Influenza A genome as a reference (see References and Annotations) (85).  
598 We extracted the UMI counts for the 10000 most frequent cell barcodes in each sample, then  
599 screened the distributions of total UMI counts, percentages of mitochondrial and viral genes  
600 across for these barcodes (within each sample), and, finally, selected cell barcodes having more  
601 than 10000 reads and not more than 15% of mitochondrial reads for downstream analysis (86).  
602 The analysis of single-cell data was performed using Seurat version 3.2.3 (87). First, the raw  
603 UMI counts were transformed to normalized expression levels on a common scale using  
604 SCTransform method implemented in Seurat which amounts to computing (Pearson) residuals  
605 in a regularized binomial regression model for UMI counts (88). The normalization was

606 performed jointly on all samples and the genes expressed in less than 10 cells were excluded  
607 prior to normalization together with the viral genes.

608 The selected cells from all samples were first clustered on the normalized expressions of  
609 hallmark marker genes only which resulted in five stable clusters. The clustering method  
610 implemented in Seurat we applied amounts to 1) constructing a  $k$ -nearest neighbor graph of all  
611 cells, 2) deriving an (approximate) shared nearest-neighbors graph, and 3) applying a  
612 modularity-based community detection to the latter graph (89). Euclidian metric was used for  
613 the construction of  $k$ -NN graph.

614 Out of the five identified global cluster lacked a clear signature and was contained a sizeable  
615 proportion of cells with high total UMI counts compared to other clusters (Figures 3, S3 and  
616 S4). Given it included only a small percentage of cells we excluded it from further analysis  
617 hypothesizing that this cluster likely contains a large percentage of doublets. The remaining  
618 four clusters were clearly identified as basal cells, ciliated cells, secretory cells and basal cells  
619 differentiating into secretory cells (Figures 3, S4). The latter two clusters were merged for  
620 further analysis.

621 The cells in the identified global cell-type clusters were then analyzed in isolation from each  
622 other in order to identify cell-type specific responses. For each cell type we first found a  
623 tentative set of genes differentially expressed between conditions and then re-clustered the cells  
624 based on their expressions across these genes. The same graph-based clustering was applied  
625 with cell distances derived from the first 10 principal components of the expression matrix.  
626 Condition-differential genes were found as a union of genes overexpressed in any condition  
627 versus the rest as assessed by the Mann-Whitney-Wilcoxon test with the nominal p-value of  
628 0.01. The obtained differential genes were ordered using a hierarchical clustering algorithm and  
629 manually curated before producing the cell-type specific heatmaps shown in Figure S7.

630 To test for the differential expression of host factors between secretory and ciliated cells in  
631 steady state conditions we first constructed a list of 52 host factor genes and retained those

632 expressed in more than 50% of secretory and ciliated cells in (steady state condition) which  
633 resulted in 33 genes. We then tested for the differences in normalized expression between  
634 secretory and ciliated cells using Mann-Whitney-Wilcoxon test (with a two-sided alternative)  
635 and adjusted the resulting p-values using Bonferroni correction. Genes displayed in Figure S7  
636 were selected manually.

637 *Human genome annotation:* GRCh38.p10 with only the main chromosome contigs retained  
638 i.e. chr1-chr22, chrX, chrY and chrM. *Human genome annotations:* Gencode release 29 with  
639 annotations of non-gene features (e.g. exons, transcripts, CDSs and UTRs) removed if they  
640 overlapped with protein-coding or lincRNA features and did not have "protein-coding",  
641 "lincRNA" or "processed-transcript" tags themselves. *Influenza A reference and annotations:*  
642 GCA\_001343785.1 (90). The viral reference annotations were preprocessed by prefixing all  
643 gene ids by "InfluenzaA" and by changing the type of "CDS" features to "exon".

644

645

646

647

648

649

650

651

652

653

654

655

656

657



658

659

660

661

662

663

664

665

666

667

668

669 **Acknowledgments**

670 We would like to thank the Genomic Platform at the University of Geneva) and Dr. Christel  
671 Borel for providing precious assistance and support in data analysis and experimental design.

672 This work was supported by the Swiss National Science Foundation (Sinergia grant  
673 CRSII5\_180323 to F.S. and C.T.) and by the Fondation Aclon (Geneva, to C.T.).

674

675 **Conflict of interest**

676 The authors declare no conflict of interest. The funders had no role in the design of the study;  
677 in the collection, analyses, or interpretation of data; in the writing of the manuscript; or in the  
678 decision to publish the results.

679

680 **Author contribution**

681 C.M. and I. K. Contribute dequally to this work. All authors designed research. C.M., Y.Z.,  
682 S.C., S. H., A.C-A.Z. and V.C., performed research. C.M. and I. K., analyzed data. C.M. and  
683 C.T. wrote the paper.

684

685

686

687 Received: ((will be filled in by the editorial staff))

688 Revised: ((will be filled in by the editorial staff))

689 Published online: ((will be filled in by the editorial staff))

690

691 References

- 692 1. J. Paget, P. Spreuwenberg, V. Charu, R. J. Taylor, A. D. Iuliano, J. Bresee, L. Simonsen, C. Viboud, N.  
693 Global Seasonal Influenza-associated Mortality Collaborator, G. L. C. Teams\*, Global mortality  
694 associated with seasonal influenza epidemics: New burden estimates and predictors from the GLaMOR  
695 Project. *J Glob Health* **9**, 020421 (2019).
- 696 2. J. S. Long, B. Mistry, S. M. Haslam, W. S. Barclay, Host and viral determinants of influenza A virus species  
697 specificity. *Nat Rev Microbiol* **17**, 67-81 (2019).
- 698 3. M. Schmolke, A. Garcia-Sastre, Evasion of innate and adaptive immune responses by influenza A virus.  
699 *Cell Microbiol* **12**, 873-880 (2010).
- 700 4. S. A. Sellers, R. S. Hagan, F. G. Hayden, W. A. Fischer, 2nd, The hidden burden of influenza: A review of  
701 the extra-pulmonary complications of influenza infection. *Influenza Other Respir Viruses* **11**, 372-393  
702 (2017).
- 703 5. P. R. Saunders-Hastings, D. Krewski, Reviewing the History of Pandemic Influenza: Understanding  
704 Patterns of Emergence and Transmission. *Pathogens* **5**, (2016).
- 705 6. A. Ibricevic, A. Pekosz, M. J. Walter, C. Newby, J. T. Battaile, E. G. Brown, M. J. Holtzman, S. L. Brody,  
706 Influenza virus receptor specificity and cell tropism in mouse and human airway epithelial cells. *J Virol*  
707 **80**, 7469-7480 (2006).
- 708 7. L. Denney, L. P. Ho, The role of respiratory epithelium in host defence against influenza virus infection.  
709 *Biomed J* **41**, 218-233 (2018).
- 710 8. L. P. Tavares, M. M. Teixeira, C. C. Garcia, The inflammatory response triggered by Influenza virus: a two  
711 edged sword. *Inflamm Res* **66**, 283-302 (2017).

- 712 9. C. Paget, F. Trottein, Mechanisms of Bacterial Superinfection Post-influenza: A Role for Unconventional  
713 T Cells. *Front Immunol* **10**, 336 (2019).
- 714 10. D. R. Cundell, N. P. Gerard, C. Gerard, I. Idanpaan-Heikkila, E. I. Tuomanen, Streptococcus pneumoniae  
715 anchor to activated human cells by the receptor for platelet-activating factor. *Nature* **377**, 435-438  
716 (1995).
- 717 11. M. Essaidi-Laziosi, F. Brito, S. Benaoudia, L. Royston, V. Cagno, M. Fernandes-Rocha, I. Piuz, E. Zdobnov,  
718 S. Huang, S. Constant, M. O. Boldi, L. Kaiser, C. Tapparel, Propagation of respiratory viruses in human  
719 airway epithelia reveals persistent virus-specific signatures. *J Allergy Clin Immunol* **141**, 2074-2084  
720 (2018).
- 721 12. M. T. Osterholm, N. S. Kelley, A. Sommer, E. A. Belongia, Efficacy and effectiveness of influenza vaccines:  
722 a systematic review and meta-analysis. *Lancet Infect Dis* **12**, 36-44 (2012).
- 723 13. J. D. Doyle, J. R. Chung, S. S. Kim, M. Gaglani, C. Raiyani, R. K. Zimmerman, M. P. Nowalk, M. L. Jackson,  
724 L. A. Jackson, A. S. Monto, E. T. Martin, E. A. Belongia, H. Q. McLean, A. Foust, W. Sessions, L. Berman,  
725 R. J. Garten, J. R. Barnes, D. E. Wentworth, A. M. Fry, M. M. Patel, B. Flannery, Interim Estimates of 2018-  
726 19 Seasonal Influenza Vaccine Effectiveness - United States, February 2019. *MMWR Morb Mortal Wkly*  
727 *Rep* **68**, 135-139 (2019).
- 728 14. S. Duwe, Influenza viruses - antiviral therapy and resistance. *GMS Infect Dis* **5**, Doc04 (2017).
- 729 15. L. V. Gubareva, V. P. Mishin, M. C. Patel, A. Chesnokov, H. T. Nguyen, J. De La Cruz, S. Spencer, A. P.  
730 Campbell, M. Sinner, H. Reid, R. Garten, J. M. Katz, A. M. Fry, J. Barnes, D. E. Wentworth, Assessing  
731 baloxavir susceptibility of influenza viruses circulating in the United States during the 2016/17 and  
732 2017/18 seasons. *Euro surveillance : bulletin europeen sur les maladies transmissibles = European*  
733 *communicable disease bulletin* **24**, (2019).
- 734 16. F. G. Hayden, M. D. de Jong, Emerging influenza antiviral resistance threats. *J Infect Dis* **203**, 6-10 (2011).
- 735 17. S. Kim, M. J. Kim, C. H. Kim, J. W. Kang, H. K. Shin, D. Y. Kim, T. B. Won, D. H. Han, C. S. Rhee, J. H. Yoon,  
736 H. J. Kim, The Superiority of IFN-lambda as a Therapeutic Candidate to Control Acute Influenza Viral  
737 Lung Infection. *Am J Respir Cell Mol Biol* **56**, 202-212 (2017).
- 738 18. E. Andreakos, M. Salagianni, I. E. Galani, O. Koltsida, Interferon-lambdas: Front-Line Guardians of  
739 Immunity and Homeostasis in the Respiratory Tract. *Front Immunol* **8**, 1232 (2017).

- 740 19. L. Prokunina-Olsson, B. Muchmore, W. Tang, R. M. Pfeiffer, H. Park, H. Dickensheets, D. Hergott, P.  
741 Porter-Gill, A. Mumy, I. Kohaar, S. Chen, N. Brand, M. Tarway, L. Liu, F. Sheikh, J. Astemborski, H. L.  
742 Bonkovsky, B. R. Edlin, C. D. Howell, T. R. Morgan, D. L. Thomas, B. Rehermann, R. P. Donnelly, T. R.  
743 O'Brien, A variant upstream of IFNL3 (IL28B) creating a new interferon gene IFNL4 is associated with  
744 impaired clearance of hepatitis C virus. *Nat Genet* **45**, 164-171 (2013).
- 745 20. J. W. Schoggins, Interferon-Stimulated Genes: What Do They All Do? *Annu Rev Virol* **6**, 567-584 (2019).
- 746 21. R. K. Durbin, S. V. Kotenko, J. E. Durbin, Interferon induction and function at the mucosal surface.  
747 *Immunol Rev* **255**, 25-39 (2013).
- 748 22. K. Witte, E. Witte, R. Sabat, K. Wolk, IL-28A, IL-28B, and IL-29: promising cytokines with type I interferon-  
749 like properties. *Cytokine Growth Factor Rev* **21**, 237-251 (2010).
- 750 23. F. McNab, K. Mayer-Barber, A. Sher, A. Wack, A. O'Garra, Type I interferons in infectious disease. *Nat*  
751 *Rev Immunol* **15**, 87-103 (2015).
- 752 24. M. Brandes, F. Klauschen, S. Kuchen, R. N. Germain, A systems analysis identifies a feedforward  
753 inflammatory circuit leading to lethal influenza infection. *Cell* **154**, 197-212 (2013).
- 754 25. B. A. Robinson, T. J. Nice, You Can Breathe Easy: IFNlambda Handles Flu without Triggering a Damaging  
755 Inflammatory Response. *Immunity* **46**, 768-770 (2017).
- 756 26. I. E. Galani, V. Triantafyllia, E. E. Eleminiadou, O. Koltsida, A. Stavropoulos, M. Manioudaki, D. Thanos,  
757 S. E. Doyle, S. V. Kotenko, K. Thanopoulou, E. Andreacos, Interferon-lambda Mediates Non-redundant  
758 Front-Line Antiviral Protection against Influenza Virus Infection without Compromising Host Fitness.  
759 *Immunity* **46**, 875-890 e876 (2017).
- 760 27. S. Davidson, T. M. McCabe, S. Crotta, H. H. Gad, E. M. Hessel, S. Beinke, R. Hartmann, A. Wack,  
761 IFNlambda is a potent anti-influenza therapeutic without the inflammatory side effects of IFNalpha  
762 treatment. *EMBO Mol Med* **8**, 1099-1112 (2016).
- 763 28. P. Hermant, T. Michiels, Interferon-lambda in the context of viral infections: production, response and  
764 therapeutic implications. *J Innate Immun* **6**, 563-574 (2014).
- 765 29. M. Mordstein, G. Kochs, L. Dumoutier, J. C. Renauld, S. R. Paludan, K. Klucher, P. Staeheli, Interferon-  
766 lambda contributes to innate immunity of mice against influenza A virus but not against hepatotropic  
767 viruses. *PLoS Pathog* **4**, e1000151 (2008).

- 768 30. J. Klinkhammer, D. Schnepf, L. Ye, M. Schwaderlapp, H. H. Gad, R. Hartmann, D. Garcin, T. Mahlakoiv, P.  
769 Staeheli, IFN-lambda prevents influenza virus spread from the upper airways to the lungs and limits virus  
770 transmission. *Elife* **7**, (2018).
- 771 31. A. J. Muir, S. Arora, G. Everson, R. Flisiak, J. George, R. Ghalib, S. C. Gordon, T. Gray, S. Greenbloom, T.  
772 Hassanein, J. Hillson, M. A. Horga, I. M. Jacobson, L. Jeffers, K. V. Kowdley, E. Lawitz, S. Lueth, M.  
773 Rodriguez-Torres, V. Rustgi, L. Shemanski, M. L. Shiffman, S. Srinivasan, H. E. Vargas, J. M. Vierling, D.  
774 Xu, J. C. Lopez-Talavera, S. Zeuzem, E. s. group, A randomized phase 2b study of peginterferon lambda-  
775 1a for the treatment of chronic HCV infection. *J Hepatol* **61**, 1238-1246 (2014).
- 776 32. E. L. Ramos, Preclinical and clinical development of pegylated interferon-lambda 1 in chronic hepatitis  
777 C. *J Interferon Cytokine Res* **30**, 591-595 (2010).
- 778 33. N. A. Ilyushina, R. P. Donnelly, In vitro anti-influenza A activity of interferon (IFN)-lambda1 combined  
779 with IFN-beta or oseltamivir carboxylate. *Antiviral Res* **111**, 112-120 (2014).
- 780 34. J. T. Nguyen, D. F. Smee, D. L. Barnard, J. G. Julander, M. Gross, M. D. de Jong, G. T. Went, Efficacy of  
781 combined therapy with amantadine, oseltamivir, and ribavirin in vivo against susceptible and  
782 amantadine-resistant influenza A viruses. *PLoS One* **7**, e31006 (2012).
- 783 35. C. Medaglia, A. C. Zwygart, P. J. Silva, S. Constant, S. Huang, F. Stellacci, C. Tapparel, Interferon Lambda  
784 Delays the Emergence of Influenza Virus Resistance to Oseltamivir. *Microorganisms* **9**, (2021).
- 785 36. O. Kocabiyik, V. Cagno, P. J. Silva, Y. Zhu, L. Sedano, Y. Bhide, J. Mettier, C. Medaglia, B. Da Costa, S.  
786 Constant, S. Huang, L. Kaiser, W. L. J. Hinrichs, A. Huckriede, R. Le Goffic, C. Tapparel, F. Stellacci, Non-  
787 Toxic Virucidal Macromolecules Show High Efficacy Against Influenza Virus Ex Vivo and In Vivo. *Adv Sci*  
788 *(Weinh)* **8**, 2001012 (2021).
- 789 37. B. Boda, S. Benaoudia, S. Huang, R. Bonfante, L. Wiszniewski, E. D. Tseligka, C. Tapparel, S. Constant,  
790 Antiviral drug screening by assessing epithelial functions and innate immune responses in human 3D  
791 airway epithelium model. *Antiviral Res* **156**, 72-79 (2018).
- 792 38. M. Essaidi-Laziosi, J. Geiser, S. Huang, S. Constant, L. Kaiser, C. Tapparel, Author Correction: Interferon-  
793 Dependent and Respiratory Virus-Specific Interference in Dual Infections of Airway Epithelia. *Sci Rep* **10**,  
794 12523 (2020).

- 795 39. I. George, C. Uboldi, E. Bernard, M. S. Sobrido, S. Dine, A. Hagege, D. Vrel, N. Herlin, J. Rose, T. Orsiere,  
796 C. Grisolia, B. Rousseau, V. Malard, Toxicological Assessment of ITER-Like Tungsten Nanoparticles Using  
797 an In Vitro 3D Human Airway Epithelium Model. *Nanomaterials (Basel)* **9**, (2019).
- 798 40. J. V. Roedig, E. Rapp, D. Hoper, Y. Genzel, U. Reichl, Impact of host cell line adaptation on quasispecies  
799 composition and glycosylation of influenza A virus hemagglutinin. *PLoS One* **6**, e27989 (2011).
- 800 41. A. Ciuffi, S. Rato, A. Telenti, Single-Cell Genomics for Virology. *Viruses* **8**, (2016).
- 801 42. S. Cristinelli, A. Ciuffi, The use of single-cell RNA-Seq to understand virus-host interactions. *Curr Opin*  
802 *Virology* **29**, 39-50 (2018).
- 803 43. N. A. Ilyushina, V. Y. Lugovtsev, A. P. Samsonova, F. G. Sheikh, N. V. Bovin, R. P. Donnelly, Generation  
804 and characterization of interferon-lambda 1-resistant H1N1 influenza A viruses. *PLoS One* **12**, e0181999  
805 (2017).
- 806 44. K. Minton, Antiviral immunity: IFNlambda offers frontline protection. *Nat Rev Immunol* **17**, 404-405  
807 (2017).
- 808 45. Irene Latino, Santiago F Gonzalez. Spatio-temporal profile of innate inflammatory cells and mediators  
809 during influenza virus infection. *Current Opinion in Physiology* 2021; 19:175-186.
- 810 46. N. E. Davey, G. Trave, T. J. Gibson, How viruses hijack cell regulation. *Trends Biochem Sci* **36**, 159-169  
811 (2011).
- 812 47. G. Mahmoudabadi, R. Milo, R. Phillips, Energetic cost of building a virus. *Proc Natl Acad Sci U S A* **114**,  
813 E4324-E4333 (2017).
- 814 48. C. B. Brooke, W. L. Ince, J. Wrammert, R. Ahmed, P. C. Wilson, J. R. Bennink, J. W. Yewdell, Most influenza  
815 a virions fail to express at least one essential viral protein. *J Virol* **87**, 3155-3162 (2013).
- 816 49. A. B. Russell, C. Trapnell, J. D. Bloom, Extreme heterogeneity of influenza virus infection in single cells.  
817 *Elife* **7**, (2018).
- 818 50. A. Puliafito, L. Hufnagel, P. Neveu, S. Streichan, A. Sigal, D. K. Fygenson, B. I. Shraiman, Collective and  
819 single cell behavior in epithelial contact inhibition. *Proc Natl Acad Sci U S A* **109**, 739-744 (2012).
- 820 51. L. B. Frankel, M. Lubas, A. H. Lund, Emerging connections between RNA and autophagy. *Autophagy* **13**,  
821 3-23 (2017).
- 822 52. G. X. Zheng, J. M. Terry, P. Belgrader, P. Ryvkin, Z. W. Bent, R. Wilson, S. B. Ziraldo, T. D. Wheeler, G. P.  
823 McDermott, J. Zhu, M. T. Gregory, J. Shuga, L. Montesclaros, J. G. Underwood, D. A. Masquelier, S. Y.

- 824 Nishimura, M. Schnall-Levin, P. W. Wyatt, C. M. Hindson, R. Bharadwaj, A. Wong, K. D. Ness, L. W. Beppu,  
825 H. J. Deeg, C. McFarland, K. R. Loeb, W. J. Valente, N. G. Ericson, E. A. Stevens, J. P. Radich, T. S.  
826 Mikkelsen, B. J. Hindson, J. H. Bielas, Massively parallel digital transcriptional profiling of single cells. *Nat*  
827 *Commun* **8**, 14049 (2017).
- 828 53. J. A. Zepp, E. E. Morrisey, Cellular crosstalk in the development and regeneration of the respiratory  
829 system. *Nat Rev Mol Cell Biol* **20**, 551-566 (2019).
- 830 54. C. Medaglia, A. Giladi, L. Stoler-Barak, M. De Giovanni, T. M. Salame, A. Biram, E. David, H. Li, M.  
831 Iannacone, Z. Shulman, I. Amit, Spatial reconstruction of immune niches by combining photoactivatable  
832 reporters and scRNA-seq. *Science* **358**, 1622-1626 (2017).
- 833 55. K. J. Travaglini, A. N. Nabhan, L. Penland, R. Sinha, A. Gillich, R. V. Sit, S. Chang, S. D. Conley, Y. Mori, J.  
834 Seita, G. J. Berry, J. B. Shrager, R. J. Metzger, C. S. Kuo, N. Neff, I. L. Weissman, S. R. Quake, M. A. Krasnow,  
835 A molecular cell atlas of the human lung from single-cell RNA sequencing. *Nature* **587**, 619-625 (2020).
- 836 56. A. M. Greaney, T. S. Adams, M. S. Brickman Raredon, E. Gubbins, J. C. Schupp, A. J. Engler, M. Ghaedi, Y.  
837 Yuan, N. Kaminski, L. E. Niklason, Platform Effects on Regeneration by Pulmonary Basal Cells as  
838 Evaluated by Single-Cell RNA Sequencing. *Cell Rep* **30**, 4250-4265 e4256 (2020).
- 839 57. S. Ruiz Garcia, M. Deprez, K. Lebrigand, A. Cavard, A. Paquet, M. J. Arguel, V. Magnone, M. Truchi, I.  
840 Caballero, S. Leroy, C. H. Marquette, B. Marcet, P. Barbry, L. E. Zaragosi, Novel dynamics of human  
841 mucociliary differentiation revealed by single-cell RNA sequencing of nasal epithelial cultures.  
842 *Development* **146**, (2019).
- 843 58. P. R. Tata, J. Rajagopal, Plasticity in the lung: making and breaking cell identity. *Development* **144**, 755-  
844 766 (2017).
- 845 59. J. K. Watson, S. Rulands, A. C. Wilkinson, A. Wuidart, M. Ousset, A. Van Keymeulen, B. Gottgens, C.  
846 Blanpain, B. D. Simons, E. L. Rawlins, Clonal Dynamics Reveal Two Distinct Populations of Basal Cells in  
847 Slow-Turnover Airway Epithelium. *Cell Rep* **12**, 90-101 (2015).
- 848 60. A. Pardo-Saganta, B. M. Law, P. R. Tata, J. Villoria, B. Saez, H. Mou, R. Zhao, J. Rajagopal, Injury induces  
849 direct lineage segregation of functionally distinct airway basal stem/progenitor cell subpopulations. *Cell*  
850 *Stem Cell* **16**, 184-197 (2015).



- 851 61. L. W. Plasschaert, R. Zilionis, R. Choo-Wing, V. Savova, J. Knehr, G. Roma, A. M. Klein, A. B. Jaffe, A single-  
852 cell atlas of the airway epithelium reveals the CFTR-rich pulmonary ionocyte. *Nature* **560**, 377-381  
853 (2018).
- 854 62. M. N. Matrosovich, T. Y. Matrosovich, T. Gray, N. A. Roberts, H. D. Klenk, Human and avian influenza  
855 viruses target different cell types in cultures of human airway epithelium. *Proc Natl Acad Sci U S A* **101**,  
856 4620-4624 (2004).
- 857 63. K. Shinya, M. Ebina, S. Yamada, M. Ono, N. Kasai, Y. Kawaoka, Avian flu: influenza virus receptors in the  
858 human airway. *Nature* **440**, 435-436 (2006).
- 859 64. H. Shelton, G. Ayora-Talavera, J. Ren, S. Loureiro, R. J. Pickles, W. S. Barclay, I. M. Jones, Receptor binding  
860 profiles of avian influenza virus hemagglutinin subtypes on human cells as a predictor of pandemic  
861 potential. *J Virol* **85**, 1875-1880 (2011).
- 862 65. Matloob Husain; Host factors involved in influenza virus infection. *Emerg Top Life Sci* 11 December 2020;  
863 4 (4): 401–410. doi: <https://doi.org/10.1042/ETLS20200232>
- 864 66. Y. Qiao, Y. Yan, K. S. Tan, S. S. L. Tan, J. E. Seet, T. V. Arumugam, V. T. K. Chow, Y. Wang, T. Tran, CD151,  
865 a novel host factor of nuclear export signaling in influenza virus infection. *J Allergy Clin Immunol* **141**,  
866 1799-1817 (2018).
- 867 67. D. Moisy, S. V. Avilov, Y. Jacob, B. M. Laoide, X. Ge, F. Baudin, N. Naffakh, J. L. Jestin, HMGB1 protein  
868 binds to influenza virus nucleoprotein and promotes viral replication. *J Virol* **86**, 9122-9133 (2012).
- 869 68. D. Demirov, G. Gabriel, C. Schneider, H. Hohenberg, S. Ludwig, Interaction of influenza A virus matrix  
870 protein with RACK1 is required for virus release. *Cell Microbiol* **14**, 774-789 (2012).
- 871 69. T. Watanabe, S. Watanabe, Y. Kawaoka, Cellular networks involved in the influenza virus life cycle. *Cell*  
872 *Host Microbe* **7**, 427-439 (2010).
- 873 70. G. P. Larson, V. Tran, S. Yu, Y. Cai, C. A. Higgins, D. M. Smith, S. F. Baker, S. R. Radoshitzky, J. H. Kuhn, A.  
874 Mehle, EPS8 Facilitates Uncoating of Influenza A Virus. *Cell Rep* **29**, 2175-2183 e2174 (2019).
- 875 71. M. A. Chua, S. Schmid, J. T. Perez, R. A. Langlois, B. R. Tenover, Influenza A virus utilizes suboptimal  
876 splicing to coordinate the timing of infection. *Cell Rep* **3**, 23-29 (2013).
- 877 72. K. U. Hong, S. D. Reynolds, S. Watkins, E. Fuchs, B. R. Stripp, In vivo differentiation potential of tracheal  
878 basal cells: evidence for multipotent and unipotent subpopulations. *Am J Physiol Lung Cell Mol Physiol*  
879 **286**, L643-649 (2004).

- 880 73. E. Eenjes, T. C. J. Mertens, M. J. Buscop-van Kempen, Y. van Wijck, C. Taube, R. J. Rottier, P. S. Hiemstra,  
881 A novel method for expansion and differentiation of mouse tracheal epithelial cells in culture. *Sci Rep*  
882 **8**, 7349 (2018).
- 883 74. Y. Fan, S. Sanyal, R. Bruzzone, Breaking Bad: How Viruses Subvert the Cell Cycle. *Front Cell Infect*  
884 *Microbiol* **8**, 396 (2018).
- 885 75. I. Ramos, G. Smith, F. Ruf-Zamojski, C. Martinez-Romero, M. Fribourg, E. A. Carbajal, B. M. Hartmann, V.  
886 D. Nair, N. Marjanovic, P. L. Monteagudo, V. A. DeJesus, T. Mutetwa, M. Zamojski, G. S. Tan, C.  
887 Jayaprakash, E. Zaslavsky, R. A. Albrecht, S. C. Sealton, A. Garcia-Sastre, A. Fernandez-Sesma, Innate  
888 Immune Response to Influenza Virus at Single-Cell Resolution in Human Epithelial Cells Revealed  
889 Paracrine Induction of Interferon Lambda 1. *J Virol* **93**, (2019).
- 890 76. A. Knodler, S. Feng, J. Zhang, X. Zhang, A. Das, J. Peranen, W. Guo, Coordination of Rab8 and Rab11 in  
891 primary ciliogenesis. *Proc Natl Acad Sci U S A* **107**, 6346-6351 (2010).
- 892 77. A. Weber, S. Dam, V. V. Saul, I. Kuznetsova, C. Muller, K. Fritz-Wolf, K. Becker, U. Linne, H. Gu, M. P.  
893 Stokes, S. Pleschka, M. Kracht, M. L. Schmitz, Phosphoproteome Analysis of Cells Infected with Adapted  
894 and Nonadapted Influenza A Virus Reveals Novel Pro- and Antiviral Signaling Networks. *J Virol* **93**,  
895 (2019).
- 896 78. B. L. Hogan, C. E. Barkauskas, H. A. Chapman, J. A. Epstein, R. Jain, C. C. Hsia, L. Niklason, E. Calle, A. Le,  
897 S. H. Randell, J. Rock, M. Snitow, M. Krummel, B. R. Stripp, T. Vu, E. S. White, J. A. Whitsett, E. E. Morrissey,  
898 Repair and regeneration of the respiratory system: complexity, plasticity, and mechanisms of lung stem  
899 cell function. *Cell Stem Cell* **15**, 123-138 (2014).
- 900 79. J. R. Rock, M. W. Onaitis, E. L. Rawlins, Y. Lu, C. P. Clark, Y. Xue, S. H. Randell, B. L. Hogan, Basal cells as  
901 stem cells of the mouse trachea and human airway epithelium. *Proc Natl Acad Sci U S A* **106**, 12771-  
902 12775 (2009).
- 903 80. G. La Manno, R. Soldatov, A. Zeisel, E. Braun, H. Hochgerner, V. Petukhov, K. Lidschreiber, M. E. Kastrioti,  
904 P. Lonnerberg, A. Furlan, J. Fan, L. E. Borm, Z. Liu, D. van Bruggen, J. Guo, X. He, R. Barker, E. Sundstrom,  
905 G. Castelo-Branco, P. Cramer, I. Adameyko, S. Linnarsson, P. V. Kharchenko, RNA velocity of single cells.  
906 *Nature* **560**, 494-498 (2018).

- 907 81. J. Ambrosioni, P. O. Bridevaux, G. Wagner, A. Mamin, L. Kaiser, Epidemiology of viral respiratory  
908 infections in a tertiary care centre in the era of molecular diagnosis, Geneva, Switzerland, 2011-2012.  
909 *Clin Microbiol Infect* **20**, 0578-584 (2014).
- 910 82. L. Pagani, Y. Thomas, B. Huttner, V. Sauvan, G. Notaridis, L. Kaiser, A. Iten, D. Pittet, S. Harbarth,  
911 Transmission and effect of multiple clusters of seasonal influenza in a Swiss geriatric hospital. *J Am*  
912 *Geriatr Soc* **63**, 739-744 (2015).
- 913 83. C. Tapparel, K. Sobo, S. Constant, S. Huang, S. Van Belle, L. Kaiser, Growth and characterization of  
914 different human rhinovirus C types in three-dimensional human airway epithelia reconstituted in vitro.  
915 *Virology* **446**, 1-8 (2013).
- 916 84. E. D. Tseligka, K. Sobo, L. Stoppini, V. Cagno, F. Abdul, I. Piuz, P. Meylan, S. Huang, S. Constant, C.  
917 Tapparel, A VP1 mutation acquired during an enterovirus 71 disseminated infection confers heparan  
918 sulfate binding ability and modulates ex vivo tropism. *PLoS Pathog* **14**, e1007190 (2018).
- 919 85. <https://support.10xgenomics.com/single-cell-gene-expression/software/overview/welcome>
- 920 86. M. D. Luecken, F. J. Theis, Current best practices in single-cell RNA-seq analysis: a tutorial. *Mol Syst Biol*  
921 **15**, e8746 (2019).
- 922 87. T. Stuart, A. Butler, P. Hoffman, C. Hafemeister, E. Papalexi, W. M. Mauck, 3rd, Y. Hao, M. Stoeckius, P.  
923 Smibert, R. Satija, Comprehensive Integration of Single-Cell Data. *Cell* **177**, 1888-1902 e1821 (2019).
- 924 88. C. Hafemeister, R. Satija, Normalization and variance stabilization of single-cell RNA-seq data using  
925 regularized negative binomial regression. *Genome Biol* **20**, 296 (2019).
- 926 89. L. Waltman, N. J. van Eck, A smart local moving algorithm for large-scale modularity-based community  
927 detection. *The European Physical Journal B* **86**, 471 (2013).
- 928 90. [https://www.ncbi.nlm.nih.gov/assembly/GCF\\_001343785.1](https://www.ncbi.nlm.nih.gov/assembly/GCF_001343785.1)

929

930

931

932

933 **Supporting Information**

934

935

936 **A novel anti-influenza combined therapy characterized using single cell RNA-sequencing**

937

938 *Chiara Medaglia*<sup>1§\*</sup>, *Ilya Kolpakov*<sup>2§</sup>, *Yong Zhu*<sup>3</sup>, *Samuel Constant*<sup>4</sup>, *Song Huang*<sup>4</sup>, *Arnaud*

939 *Charles-Antoine Zwygart*<sup>1</sup>, *Valeria Cagno*<sup>5</sup>, *Emmanouil T. Dermitzakis*<sup>2</sup>, *Francesco Stellacci*<sup>3</sup>,

940 *Ioannis Xenarios*<sup>2</sup> and *Caroline Tapparel*<sup>1\*</sup>.

941

942 <sup>1</sup> Department of Microbiology and Molecular Medicine, University of Geneva, Switzerland.

943 <sup>2</sup> Health 2030 Genome Center, Geneva, Switzerland.

944 <sup>3</sup> Insitute of Materials, Ecole Polytechnique Fédérale de Lausanne, Switzerland.

945 <sup>4</sup> Epithelix Sas, Geneva, Switzerland.

946 <sup>5</sup> Faculty of Biology and Medicine, Université de Lausanne, Switzerland.

947 <sup>§</sup> These authors contributed equally to this work.

948 \* Correspondence: [caroline.tapparel@unige.ch](mailto:caroline.tapparel@unige.ch), [chiara.medaglia@unige.ch](mailto:chiara.medaglia@unige.ch).

949

950

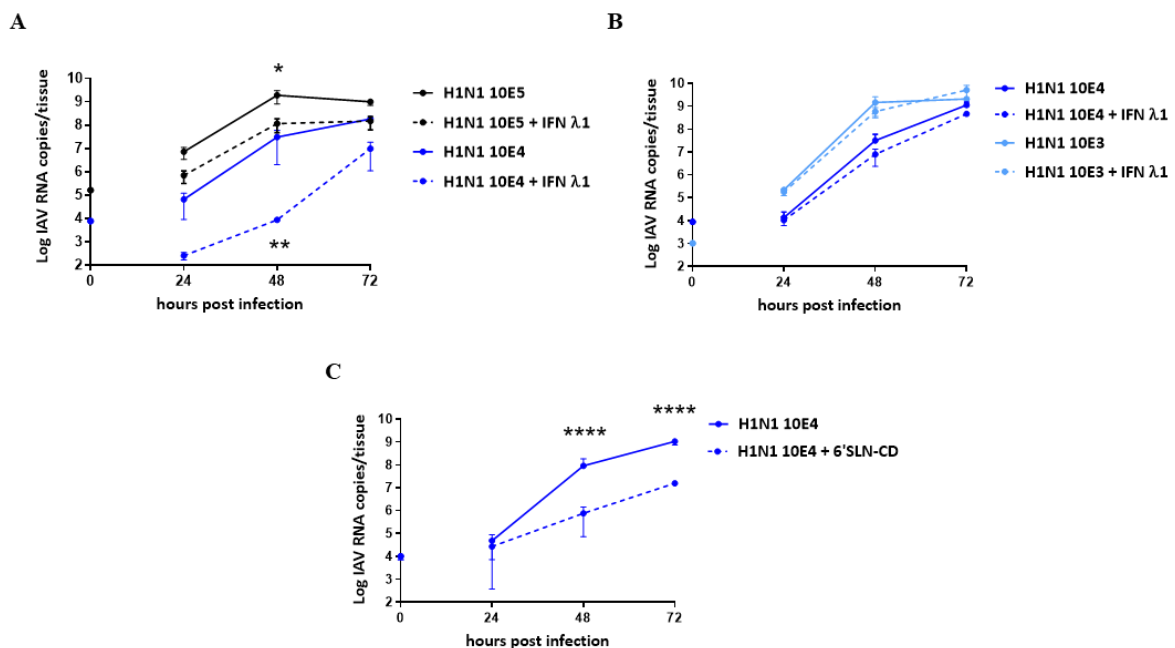

951 **Figure S1.** Antiviral activity of IFN  $\lambda$ 1 and 6'SLN-CD in HAE. HAE developed from a single donor were treated  
952 on their basal side with IFN  $\lambda$ 1 (5.5 ng/insert) either starting at 24 hbi **A**), or at 8 hpi **B**), and infected with different  
953 numbers of RNA copies of clinical A/Switzerland/3076/2016 H1N1 (0 h corresponds to the time of viral  
954 inoculation). IFN  $\lambda$ 1 was then administered daily up to 48 hpi. **C**) 6'SLN-CDs (60  $\mu$ g/insert) were administered  
955 daily on the apical side of the tissues, starting from 8 hpi and up to 48 hpi. Viral replication was assessed measuring  
956 the apical release of IAV by RT-qPCR. The results were obtained using HAE developed from different donors and  
957 represent the mean and standard deviation from two independent experiments. \*,  $p \leq 0.5$ ; \*\*,  $p \leq 0.01$ ; \*\*\*\*,  $p \leq$   
958 0.0001.  
959

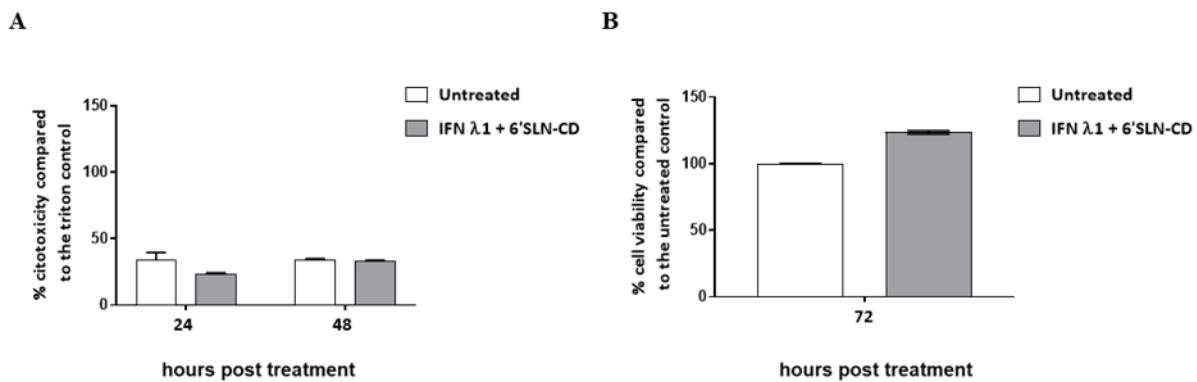

960  
961 **Figure S2.** Toxicity assessment of IFN  $\lambda$ 1 + 6'SLN-CD in uninfected HAE. **A**) Measurement of cellular  
962 cytotoxicity by LDH assay. The percentage of LDH release was calculated compared to the triton cytotoxicity  
963 control. **B**) Measurement of cell metabolic activity by MTT assay. The percentage of MTT reduction into formazan  
964 was calculated relatively to the untreated control. The tissues were treated daily with 6'SLN-CD on their apical  
965 surface and with IFN  $\lambda$  on their basal side (60  $\mu$ g and 5.5 ng per tissue, respectively, in PBS), for 72 h. The MTT  
966 assay was performed at 72 hours post treatment (hpt), while the LDH assay was performed at both 24 and 48 hpt  
967 on the apical sides of the tissues. Untreated control tissues (untreated) and cytotoxicity control tissues were treated  
968 on their apical side with PSB or with PBS-Triton 5%, respectively. The results represent the mean and standard  
969 deviation from two independent experiments performed in duplicate.

970

971

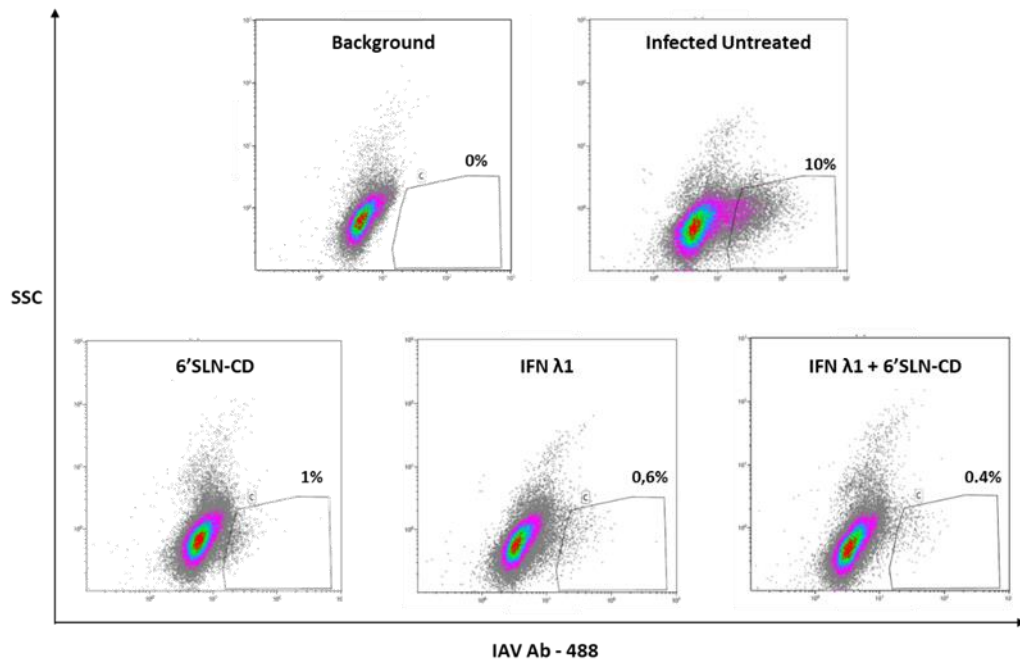

972

973 **Figure S3.** Flow cytometry (FACS) analysis of infected HAE cells at 48 hpi, with an antibody (Ab) targeting IAV  
974 nucleoprotein. The results were obtained from the same tissues shown in figure 1B and are representative of two  
975 independent experiments. HAE developed from a pool of donors were infected with  $10^3$  RNA copies of clinical  
976 A/Switzerland/3076/2016 H1N1 and treated or not with 6'SLN-CDs (60  $\mu$ g/tissue, administered daily starting at  
977 8 hpi), or with IFN  $\lambda$  (5,5 ng/tissue, administered daily starting from 24h before infection), or with both compounds.  
978 At 48 hpi the tissues underwent enzymatic digestion and staining. The gating was defined based on the background  
979 signal obtained from an infected tissue stained with the 2<sup>nd</sup> Ab alone.

980

981

982

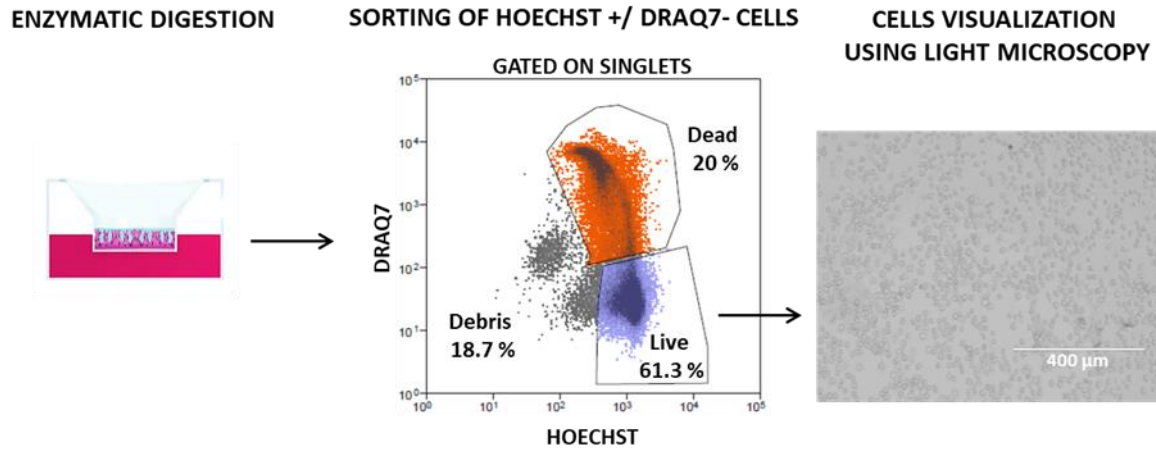

983 **Figure S4.** HAE dissociation protocol for scRNA sequencing. Upon enzymatic digestion, cells were stained with  
984 Hoechst to label the nuclei and with DRAQ7 to exclude non-viable cells. Hoechst +/-DRAQ7 – cells were sorted,  
985 visualized at the light microscope and then processed for scRNA-seq analysis.

986



**A**

| Hallmark genes | Cell type |
|----------------|-----------|
| TP63           | Basal     |
| ITGA6          |           |
| KRT5           |           |
| KRT17          |           |
| LY6D           |           |
| KRT4           | Secretory |
| KRT8           |           |
| CYP2F1         |           |
| KRT7           |           |
| VMO1           |           |
| SPRR3          |           |
| AGR2           |           |
| BPIFB1         |           |
| BPIFA1         |           |
| SCGB1A1        |           |
| SCGB3A1        |           |
| LYZ            | Ciliated  |
| MUC5AC         |           |
| FOXJ1          |           |
| TPPP3          |           |
| STOLM3         |           |
| ERICH3         |           |
| LRRC23         |           |
| PIFO           |           |
| IFT57          |           |

**B**

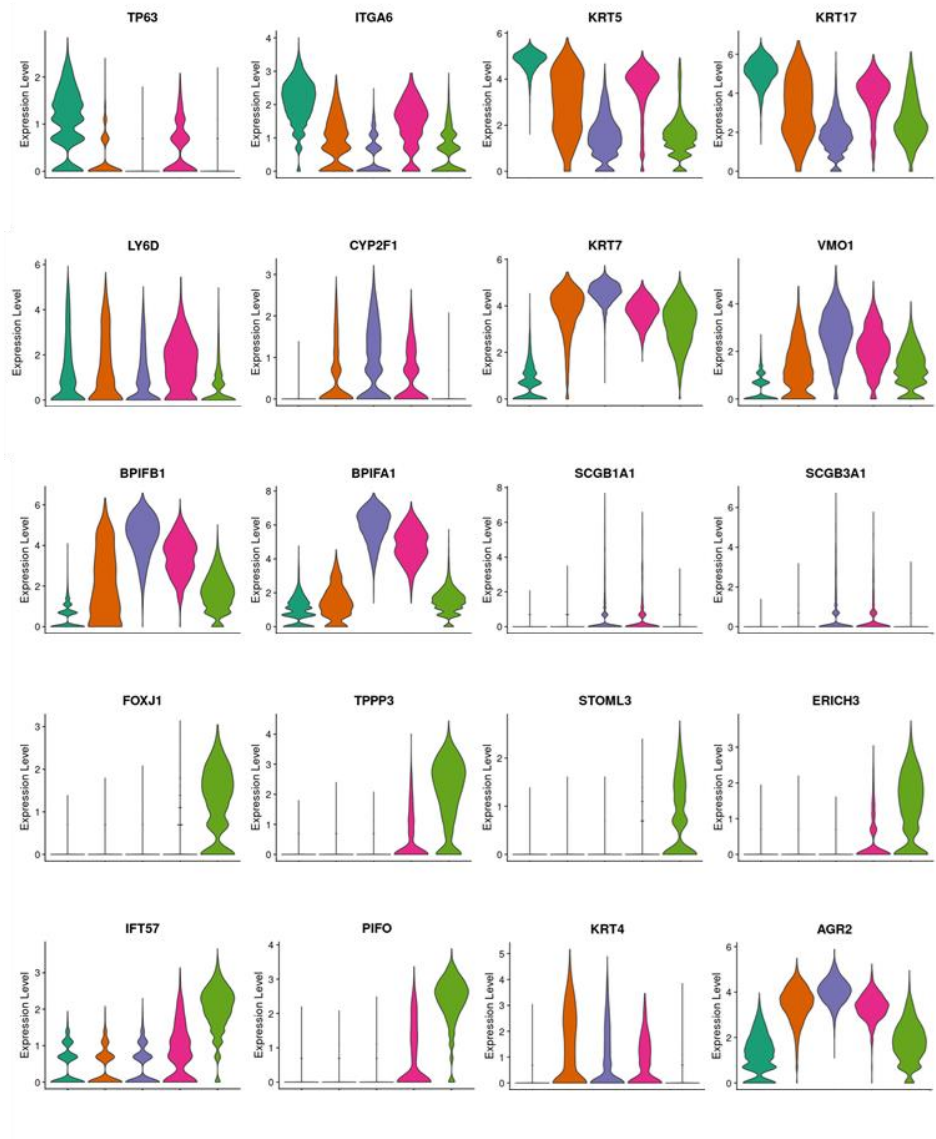

**C**

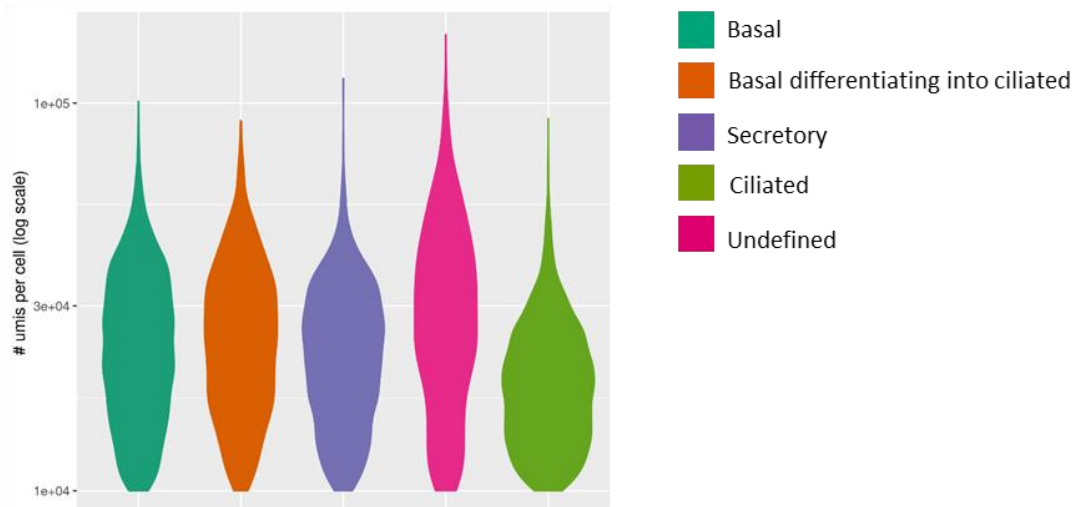

987

988

989

990

991 **Figure S5. A)** Hallmark genes used to annotate the main human epithelial respiratory cell types. **B)** Violin plots  
 992 showing the expression distribution of cell-type specific hallmark genes across the HAE cells clusters described  
 993 in Figure 2D. **C)** Violin plots showing the UMI (unique molecular identifiers) distributions across HAE cell  
 994 clusters.

995

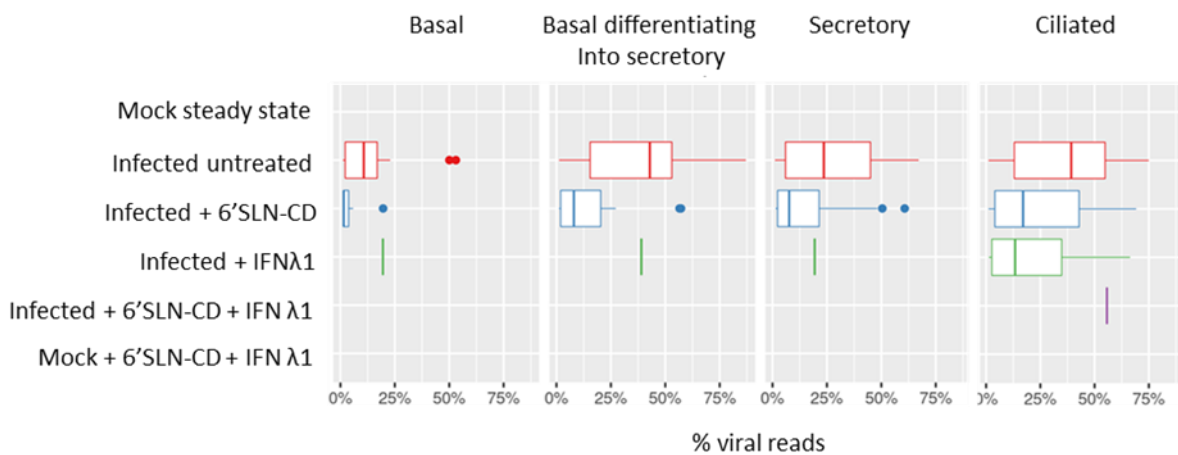

996 **Figure S6.** Box plot showing the distribution of viral mRNA molecules in cells having more than 1% of viral  
 997 reads, across different HAE clusters experimental conditions.

998

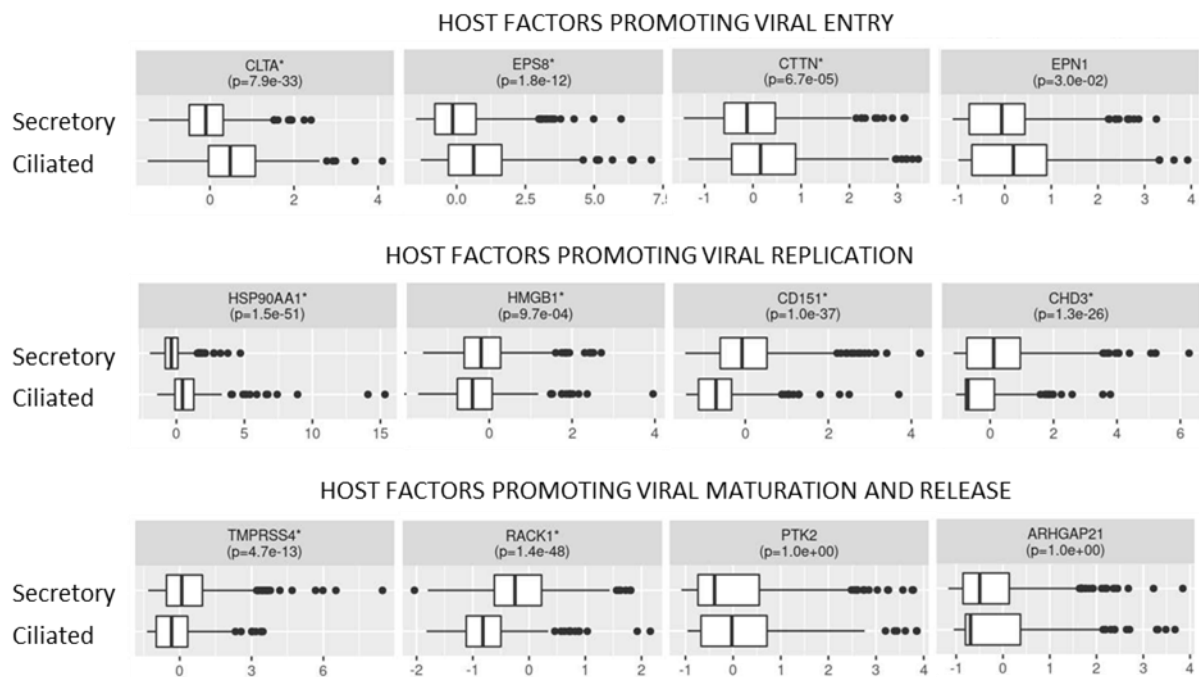

999

1000 **Figure S7.** Expression of host factors involved in IV replication across secretory and ciliated cells in steady state  
1001 conditions. Expression values are Pearson residuals from SCTransform binomial regression model and p-values  
1002 are from Mann-Whitney-Wilcoxon test, additionally adjusted for multiple testing (see Methods).  
1003



1004

A

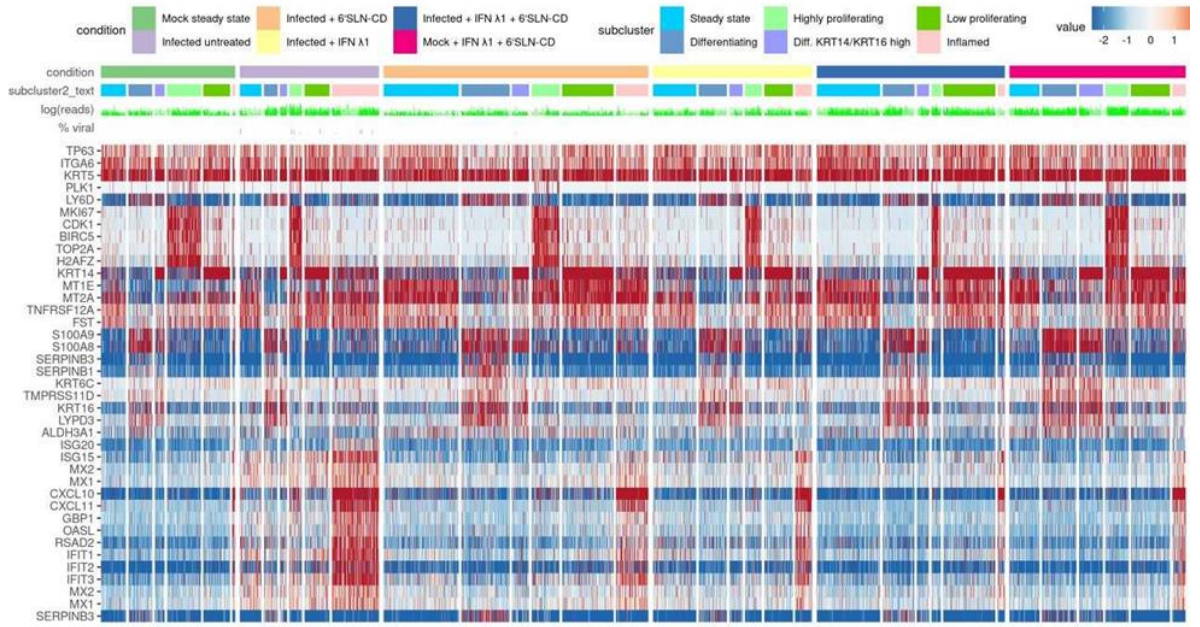

B

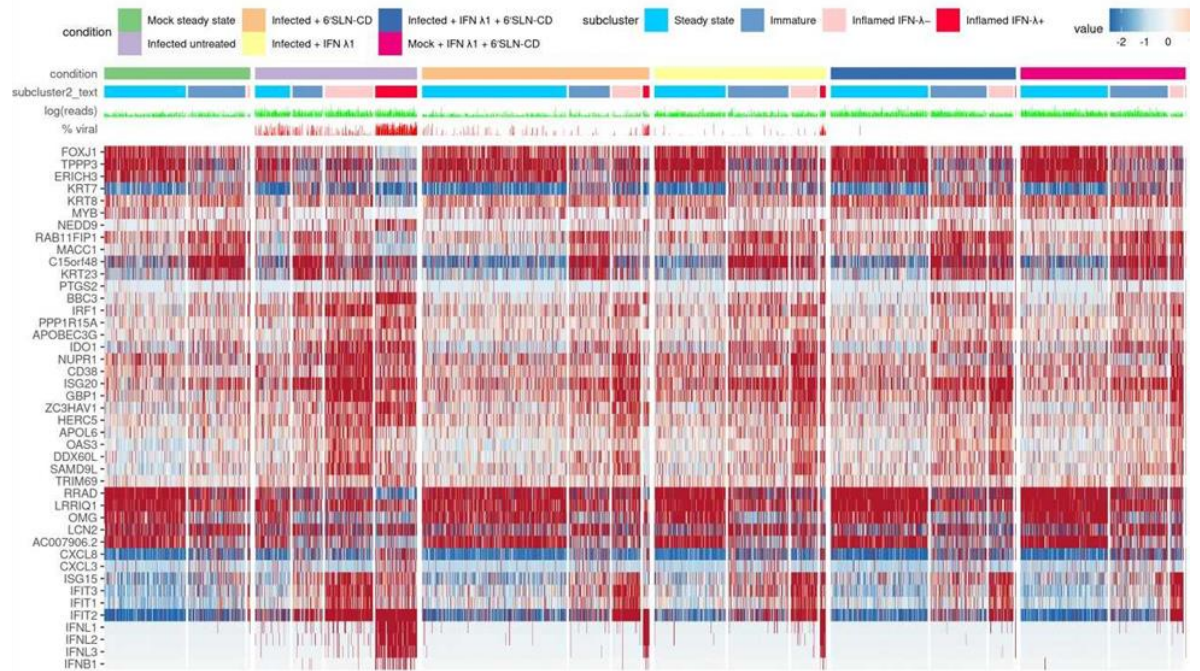

C

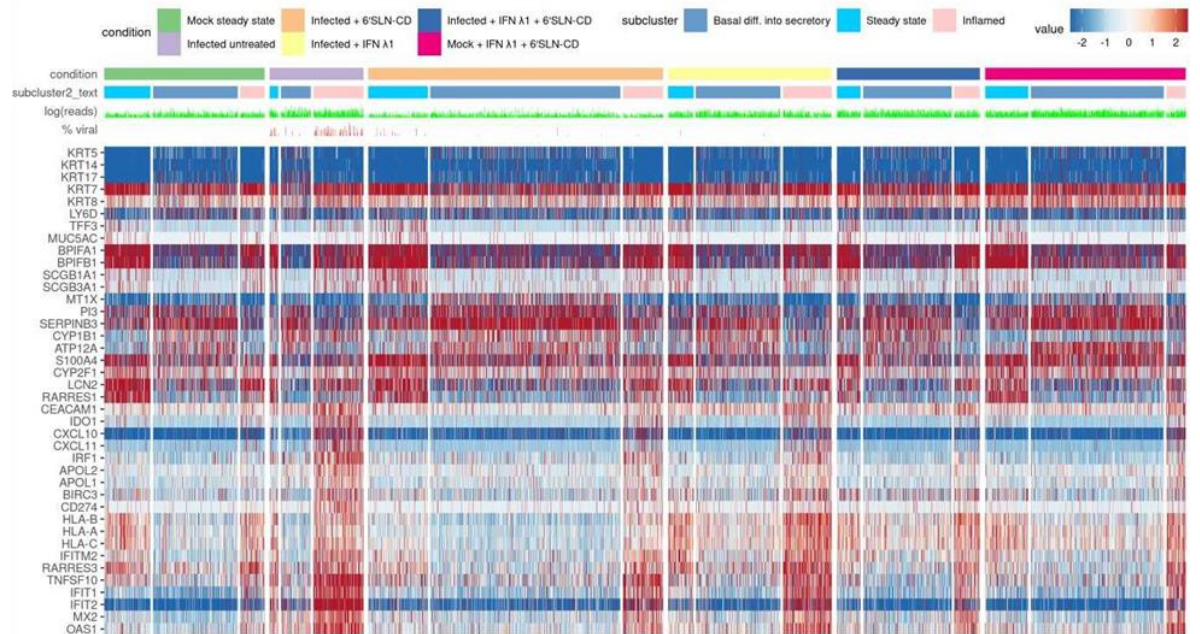

1005 **Figure S8.** Gene expression profiles of basal (A), ciliated (B) and secretory (C) cells subclusters across  
1006 experimental conditions (see Figure 4). The percentages of viral reads across cells are shown in red above the  
1007 heatmaps, while the number of total UMI counts is shown in light green. Expression values are Pearson residuals  
1008 from SCTransform binomial regression model [70] fitted to UMI counts (see Methods).  
1009
